# Supplementary material for: Identification of four unconventional kinetoplastid kinetochore proteins KKT22–25 in Trypanosoma brucei
Source: Open Biol. 2019 Dec 4;9(12):190236. doi: 10.1098/rsob.190236 (PMC6936259; doi:10.1098/rsob.190236)
Supplement: Table S1.xlsx [file rsob190236supp2.xlsx]

## Sheet: Table S1
Name	KKT3 (BAP1123)	KKT22 (BAP1490)	KKT23 (BAP1549)	KKT24 (BAP1635): this sample appears to have higher background	KKT25 (BAP1742)	KKT2 (BAP122, re-analysis of previous YFP-KKT2 IP/MS data reported in Akiyoshi and Gull 2014 Cell)	KKIP1 (BAP710)	KKIP2 (BAP825)	KKIP3 (BAP826)	KKIP4 (BAP808): this sample appears to have higher background	KKIP5 (BAP827): only 1 peptide was detected for KKIP5 (not shown)	KKIP6 (BAP828): this sample appears to have higher background	KKIP7 (BAP829)	Length (amino acids)	Common contaminant (found in immunoprecipitates of YFP-tagged non-kinetochore proteins), marked with *	Comments	Annotations
Tb927.9.10920	194	426	258	12		6	18		2	3	2	6		1058		KKT3	kinetoplastid kinetochore protein 3
Tb927.9.6420	6	10	67											304		KKT22	hypothetical protein, conserved
Tb927.10.6600	7	38	12											348		KKT23	hypothetical protein, conserved
Tb927.10.4200		11		126	277		3		5					864		KKT24	hypothetical protein, conserved
Tb927.8.2830				32	28									237		KKT25	hypothetical protein, conserved
Tb927.11.10520	39	104	21	88	14	55	79		21	4		4		1260		KKT2	kinetoplastid kinetochore protein 2
Tb927.5.4520				9		6	182							926		KKIP1 (KKT21)	KKIP1
Tb927.10.6330	32	124	30	106	19	31	172	5	27	6		7		1594		KKT1	kinetoplastid kinetochore protein 1
Tb927.8.3680	6	40	13	33	8	3	58		16					645		KKT4	kinetoplastid kinetochore protein 4
Tb927.7.4850	2	23	5	19	5	2	23							228		KKT5	kinetoplastid kinetochore protein 5
Tb927.6.1210	13	42	9	20	6	6	24		3			2		205		KKT6	kinetoplastid kinetochore protein 6
Tb927.11.1030	43	273	62	153	48	22	176	3	34	9		3		644		KKT7	kinetoplastid kinetochore protein 7
Tb927.11.12410	7	46	7	40		13	25							465		KKT10	kinetoplastid kinetochore protein 10
Tb927.11.12420	6	26	8	34	4	8	23							484		KKT19	kinetoplastid kinetochore protein 19
Tb927.8.1680	2	11	2	5	3		11							200		KKT12	kinetoplastid kinetochore protein 12
Tb927.4.5110	12	103	24	52	16	17	81					2		399		KKT8	kinetoplastid kinetochore protein 8
Tb927.8.1150	8	35	16	88	11	9	98		2					342		KKT9	kinetoplastid kinetochore protein 9
Tb927.7.2110	4		3	24	2	8	32							251		KKT11	kinetoplastid kinetochore protein 11
Tb927.10.7240	4	39	6	29	8	3	28		10					685		KKT14	kinetoplastid kinetochore protein 14
Tb927.6.3760	2			6		2	14		7					338		KKT15	kinetoplastid kinetochore protein 15
Tb927.11.1000						4								141		KKT16	kinetoplastid kinetochore protein 16
Tb927.3.2330	2		2	5	2	4	4			2				618		KKT17	kinetoplastid kinetochore protein 17
Tb927.9.3800		2		3										598		KKT18	kinetoplastid kinetochore protein 18
Tb927.7.4860														339		KKT13	kinetoplastid kinetochore protein 13
Tb927.8.4760														265		KKT20	kinetoplastid kinetochore protein 20
Tb927.5.1320				2				71	44	6		2		987		KKIP2	KKIP2
Tb927.10.6700				4	2			270	157	20		23		508		KKIP3. HHpred: putative PDZ domain	KKIP3
Tb927.7.3080				4				12	17	325		218		429		KKIP4. HHpred: putative RNA recognition motif (RRM)	KKIP4
Tb927.7.6630				7	11									845		KKIP5	KKIP5
Tb927.1.4680								4	4	128		57		331		KKIP6. HHpred: putative CTD kinase subunit gamma	KKIP6
Tb927.11.12480													92	637		KKIP7	KKIP7 kinetoplastid-specific phospho-protein phosphatase, putative
Tb927.3.3160								72	37	11		7		487		KKIP8: Enriched in KKIP2/3 IP samples	Nuclear poly(A) polymerase 1
Tb927.9.13970				2				14	16	268		172		339		KKIP9: Enriched in KKIP4/6 IP samples. HHpred: putative RNA recognition motif (RRM)	hypothetical protein, conserved
Tb927.4.3150				2				12	12	258		216		343		KKIP10: Enriched in KKIP4/6 IP samples. HHpred: putative RNA recognition motif (RRM)	hypothetical protein, conserved
Tb927.9.7820				3	4			164	142	16		20		771		KKIP11: Enriched in KKIP2/3 IP samples	hypothetical protein, conserved
Tb927.11.3340								4	2	120		85		250		KKIP12: Enriched in KKIP4/6 IP samples	RNA-binding protein 34, putative
Tb927.3.3740				4			2	2	7	187		106		621		Enriched in KKIP4/6 IP samples	Zinc-finger double-stranded RNA-binding, putative
Tb927.10.11600				2				3	8	157		77		599		Enriched in KKIP4/6 IP samples. HHpred: putative splicing factor, arginine/serine-rich	hypothetical protein, conserved
Tb927.7.5590				2					4	138		82		1645		Enriched in KKIP4/6 IP samples	Domain of unknown function (DUF3883), putative
Tb927.11.7450									2	79		26		599		Enriched in KKIP4/6 IP samples. HHpred: HIT zinc finger	zinc finger protein family member, putative
Tb927.11.2900										44		18		194		Enriched in KKIP4/6 IP samples	HIT zinc finger, putative
Tb927.2.3160										27		14		429		Enriched in KKIP4/6 IP samples	Gar1/Naf1 RNA binding region, putative
Tb927.10.170										23		19		427		Enriched in KKIP4/6 IP samples	tRNA pseudouridine synthase, Cbf5p
Tb927.5.3250										18		18		1557		Enriched in KKIP4/6 IP samples. HHpred: weak similarity to pre-mRNA-splicing factor 8	hypothetical protein, conserved
Tb927.10.4740										16		14		63		Enriched in KKIP4/6 IP samples. HHpred: H/ACA ribonucleoprotein complex subunit Nop10	nucleolar RNA-binding protein, putative
Tb927.7.6320										14		8		639		Enriched in KKIP4/6 IP samples	BTB/POZ domain/Regulator of chromosome condensation (RCC1) repeat, putative
Tb927.4.5020									3			20		1765		Enriched in KKIP6 IP sample	DNA-directed RNA polymerase II subunit RPB1
Tb927.8.7400										19				1765		Enriched in KKIP4 IP sample	RNA polymerase IIA largest subunit
Tb927.7.5750				2			2			2				1063		APC subunit, AP2	hypothetical protein, conserved
Tb927.8.4140				3						5		5		415		APC subunit, AP3	hypothetical protein, conserved
Tb927.1.3910				4			2	4	3	5		4	3	907		APC subunit, CDC23	TPR repeat, putative
Tb927.6.3280				3			2		2	5		3		1837		APC subunit, APC1	cyclosome subunit 1, putative
Tb927.10.15690												2		235		APC subunit, APC10/DOC1	anaphase promoting complex, subunit 10-like protein
Tb927.9.6539				2					2			2		77		APC subunit, APC12/CDC26 (Unpublished data, BA)
Tb927.10.10330										3		3		557		APC subunit, APC3	Anaphase-promoting complex, cyclosome, subunit 3/TPR repeat, putative
Tb927.11.5590									2			2		749		APC subunit, APC4	hypothetical protein, conserved
Tb927.6.2150									3					599		APC subunit, APC6/CDC16	cell division cycle protein 16 homolog, putative
Tb927.7.5090	5	6					6					3		954		Cnd2	condensin complex subunit 2, putative
Tb927.3.3110							3							1061		Cnd3	Nuclear condensing complex subunits, C-term domain containing protein, putative
Tb927.10.10340	2	5		4			4					2		1175		Smc2	structural maintenance of chromosome 2, putative
Tb927.10.740	2			2			6							1366		Smc4	structural maintenance of chromosome 4, putative
Tb927.7.6900	4	4	4	5			3	2	3	6		7		584		Scc1	double-strand-break repair protein rad21 homolog, putative
Tb927.10.6010	3	3										2		1164		Scc3	STAG domain containing protein, putative
Tb927.9.11850	7		2							4		4		1275		Smc1	structural maintenance of chromosome 1, putative
Tb927.5.3510	5	11	2	2						7		5		1199		Smc3	structural maintenance of chromosome 3 , putative
Tb927.11.6420										2		4		1319		Pds5	hypothetical protein, conserved
Tb927.9.1340	2			33	10		11	10	19	10		9		813		Mlp1	Myosin-like protein
Tb927.11.330				3				2	6	17		9		984		Mlp2	Nucleoporin
Tb927.11.8220		2		7			5							309		AUK1	aurora B kinase
Tb927.6.4820		2		13	2		20							263		CPC1	chromosomal passenger protein
Tb927.11.14840				3			4							250		CPC2	chromosomal passenger protein
Tb927.11.2880	2			18			8							862		KIN-A	kinesin, putative
Tb927.7.5040		2		7			16							624		KIN-B	kinesin, putative
Tb927.3.1750				2										201		Mad2	Mad2-like HORMA domain containing protein
Tb927.11.14370				7					2					936		MAP103	hypothetical protein, conserved
Tb927.1.2430	40	13	2				8							133		Histone H3	histone H3, putative
Tb927.5.4170	31		2	8		2	4			8		2		100		Histone H4	histone H4, putative
Tb927.2.2670	10			2										100		Histone H4v	histone H4 variant
Tb927.10.15350	7			2										139		Histone H3v	histone H3 variant V
Tb927.11.1800				3										80		Histone H1	histone H1, putative
Tb927.10.10451	91	150	38	45	5	4					3			112	*	Histone H2B	histone H2B
Tb927.7.2820	71	19	15	23		4	9		2	12		9	2	134	*	Histone H2A	histone H2A, putative
Tb927.10.10460							20	3	5	18		9	3	112	*	Histone H2B	histone H2B, putative
Tb927.1.2330	241	142	81	340	79	22	82	97	113	216	73	178	105	442	*		beta tubulin
Tb927.1.2410	205	138	65	184	63	16	47	70	84	153	54	132	74	300	*		beta tubulin, pseudogene
Tb927.1.2340	139	41	31	126	26	14	52	46	58	94	23	95	61	451	*		alpha tubulin
Tb927.10.10280	44	173	33	102	25	8	39	45	53	38	12	42	41	2371	*		microtubule-associated protein, putative
Tb927.10.10360	38	167	37	143	26	8	43	42	52	37	10	49	37	3198	*		microtubule-associated protein, putative
Tb927.10.8940	37	19	29	127	44	17	31	37	61	44	21	51	32	411	*		flagellum targeting protein kharon1, putative
Tb927.11.17000	34	3	8	47	4	7	22	27	41	55	10	52	29	1004	*		leucine-rich repeat protein (LRRP), putative
Tb927.9.13820	32	13	2	12	2	7	14			2		5		92	*		kinetoplastid membrane protein 11-3
Tb927.9.10770	29		16	47		3	8	16	37	91		73	6	555	*		polyadenylate-binding protein 2
Tb927.5.2080	22	12	9	22		2	7	8	12	76		36	3	491	*		GMP reductase
Tb927.7.3550	20	6	5	42	2		16	16	23	26	4	42	13	1241	*		cytoskeleton associated protein, putative
Tb927.6.4280	15	18	29	63	4	5	6	8	12	50	7	31	9	359	*		glyceraldehyde 3-phosphate dehydrogenase, glycosomal
Tb927.8.3060	15		2	21			7	3	2	6		12	3	671	*		cytosolic leucyl aminopeptidase, putative
Tb927.10.5620	14		5	67		5		3	11	96		39		372	*		fructose-bisphosphate aldolase, glycosomal
Tb927.4.1300	13	4		8		3		3	5	4		5	4	374	*		amidinotransferase, putative
Tb927.3.1010	13		6	30	4		16	16	14	16	4	28	12	600	*		hypothetical protein, conserved
Tb927.11.2610	12			13		2	6	6	13	7		22	11	461	*		hypothetical protein, conserved
Tb927.8.1330	11		3	32					4	12		13		276	*		60S ribosomal protein L7a, putative
Tb927.10.15760	11			16			6	6	9	7	2	8	5	315	*		hypothetical protein, conserved
Tb927.3.5050	10		6	36			2	3	5	18		15		374	*		60S ribosomal protein L4
Tb927.4.3950	10			14			2	5	7	9	2	10	5	853	*		cytoskeleton-associated protein CAP5.5, putative
Tb927.9.2470	9			26			3	6	14	16		21	7	757	*		nucleolar protein
Tb927.2.4230	8	51	14	43		3		5	19	12		33	5	3647	*		NUP-1 protein, putative
Tb927.8.3530	8		5	4	8		2	4	4	8	9	9	4	354	*		glycerol-3-phosphate dehydrogenase [NAD+], glycosomal
Tb927.9.2490	7	4		18		4		4	11	14		13	5	579	*		nucleolar protein
Tb927.10.2100	7		4	18			5	5	6	13	2	20	5	449	*		elongation factor 1-alpha
Tb927.10.3990	7		2	8			3	7	11	29	3	18	6	406	*		DHH1
Tb927.10.5460	6		2	14						5		8		125	*		60S ribosomal protein L24, putative
Tb927.11.4300	6			24				2	4	11		12	2	193	*		60S ribosomal protein L18, putative
Tb927.11.6280	6			11				7	8	15	2	16	4	913	*		pyruvate phosphate dikinase
Tb927.6.5070	6			4			2	5	5	6		10	4	454	*		hypothetical protein, conserved
Tb927.6.4670	5	44	6	56	6	5	39		10	4	3	2		358	*		MORN repeat-containing protein 1
Tb927.10.2090	5	5		15	4				5	9		18		449	*		elongation factor 1-alpha
Tb927.11.14130	5		2	17					2	8		6	2	179	*		ribosomal protein L18, putative
Tb927.11.16280	5			29				3	5	9	5	8	4	260	*		60S ribosomal protein L8, putative
Tb927.11.680	5			25		2		4	4	6		10	4	159	*		ribosomal protein L21E (60S), putative
Tb927.7.3440	5			7			3	2	2	3		7		246	*		I/6 autoantigen
Tb927.3.3310	4		6	47				3	6	5		12		218	*		60S ribosomal protein L13, putative
Tb927.8.1270	4		5	11					4	7		18		562	*		conserved protein
Tb927.4.1790	4		4	50			2		4	11	2	18	2	480	*		ribosomal protein L3, putative
Tb927.10.11390	4		2	10					3	12		11		192	*		60S ribosomal protein L6, putative
Tb927.4.3060	4		2	4			2	3	4	3	3	4	2	148	*		hypothetical protein, conserved
Tb927.11.11010	4			81		3	20	7	15	30	8	20	6	348	*		hypothetical protein, conserved
Tb927.6.1470	4			15			9	10	18	46	13	22	13	223	*		hypothetical protein, conserved
Tb927.3.1840	4			15				3	3	21		16	5	298	*		3-oxo-5-alpha-steroid 4-dehydrogenase, putative
Tb927.11.1840	4			14		2	3		4	13		9		399	*		hypothetical protein, conserved
Tb927.10.7680	3	3		7				5	8	8		12	2	530	*		GTPase activating protein, putative
Tb927.10.14550	3		13	12	30	2	2	4	6	15	9	9	3	660	*		ATP-dependent RNA helicase HEL67
Tb927.7.1730	3		7	28				2		5		9	3	242	*		60S ribosomal protein L7, putative
Tb927.7.270	3		7	6					2	6		7		437	*		ribosome biogenesis protein, putative
Tb927.4.2630	3		5	5					2	8		9		843	*		ATP-dependent DEAD/H RNA helicase, putative
Tb927.11.6180	3		4	37	3		2	10	14	6	6	12	16	146	*		60S ribosomal protein L28, putative
Tb927.10.14700	3		4	21				2		4	2	6		342	*		hypothetical protein, conserved
Tb927.11.11290	3		4	2			3	2	2	6		5	2	676	*		heat shock protein 70, putative
Tb927.4.3550	3		3	12					2	6		6		342	*		60S ribosomal protein L13a, putative
Tb927.10.1100	3		2	24		2	2	2	5		2	11	4	189	*		60S ribosomal protein L9, putative
Tb927.9.13280	3		2	6					4	10		11		429	*		Double RNA binding domain protein 9
Tb927.9.13990	3		2	3					4	29		15		305	*		RNA-binding protein, putative
Tb927.11.3590	3			54		2			5	9		24	3	273	*		40S ribosomal protein S4, putative
Tb927.3.3270	3			31		3	6		2	10		5	2	487	*		ATP-dependent 6-phosphofructokinase, glycosomal
Tb927.8.4970	3			21			3	2	5	9	2	12	3	600	*		Paraflagellar rod protein 2-1
Tb927.9.8070	3			20					3	9	2	6		213	*		60S ribosomal protein L10, putative
Tb927.9.6920	3			13			3	3	8	4		13	4	362	*		hypothetical protein, conserved
Tb927.8.2030	3			11			2	3	5	6		10	2	421	*		xxx Hilton 2018 PAVE1 posterior Hilton 2018 hypothetical protein, conserved
Tb927.7.2640	3			8			3	6	3	5		13	6	453	*		cytoskeleton associated protein, putative
Tb927.3.1120	3			8						9		6		217	*		GTP-binding nuclear protein rtb2, putative
Tb927.2.3370	3			7						4		6		377	*		UDP-Gal or UDP-GlcNAc-dependent glycosyltransferase, putative
Tb927.9.5320	3			5					3	57		28		501	*		nucleolar RNA binding protein, putative
Tb927.9.5690	3			5						2		5		113	*		60S acidic ribosomal protein, putative
Tb927.10.7330	3			5						2				137	*		40S ribosomal protein S24E, putative
Tb927.9.15150	3			3						3		2		308	*
Tb927.7.3450	3			3						2		2		195	*		I/6 autoantigen
Tb927.10.15250	3			2			3	3	3	7		6	3	485	*		paraflagellar rod component, putative
Tb927.8.8330	3			2			3			3		2		888			calpain, putative
Tb927.9.1500	3								2				2	465			protein kinase, putative
Tb927.10.7620	3									6		3		657	*		mitochondrial ATP-dependent zinc metallopeptidase, putative
Tb927.10.14680	2	2	2	4						8		10		307	*		ribosome biogenesis protein, putative
Tb927.8.7260	2		5	3										1028			kinetoplast-associated protein, putative
Tb927.10.14600	2		3	44				2	4	11		16	3	266	*		40S ribosomal protein S2, putative
Tb927.10.3930	2		2	27			2	2	6	5	2	15	3	256	*		40S ribosomal protein S3A, putative
Tb927.9.15210	2		2	15						2		5		109	*		ribosomal protein L36, putative
Tb927.11.11230	2		2	9						9		6		189	*		60S ribosomal protein L14, putative
Tb927.4.2080	2			108			9	3	5	5		15	4	906	*		Coiled-coil and C2 domain-containing protein
Tb927.8.4580	2			37			7	5	6	19	3	14	2	483	*		Tumour suppressor, Mitostatin, putative
Tb927.9.11380	2			33			2		2	13		11	2	139	*		60S ribosomal protein L23, putative
Tb927.3.930	2			26			5	3	2	12		9	2	4639	*		dynein heavy chain, putative
Tb927.11.1430	2			24		2	4		2	13		5	2	752	*		Repeat of unknown function (DUF1126)/EF-hand domain pair, putative
Tb927.8.6150	2			24						6		5		220	*		40S ribosomal protein S8, putative
Tb927.4.2180	2			23				2	3	15		14		149	*		60S ribosomal protein L35a, putative
Tb927.9.11490	2			22						3		4		145	*		60S ribosomal protein L27a
Tb927.2.2510	2			20						14		6		270	*		Mitochondrial outer membrane protein porin 1
Tb927.7.5000	2			15					2	7		8	2	260	*		60S ribosomal protein L19, putative
Tb927.9.6070	2			14						3		5		266	*		40S ribosomal protein S3, putative
Tb927.7.3410	2			13			2			2		5		149	*		centrin-4
Tb927.1.120	2			13						8		8		856	*		retrotransposon hot spot protein 4 (RHS4), putative
Tb927.11.3400	2			10						3		2		312			hypothetical protein, conserved
Tb927.10.14630	2			9						26		7		228	*		fibrillarin, putative
Tb927.2.4550	2			8					4	13		14		905	*		FtsJ cell division protein, putative
Tb927.11.6300	2			8										190	*		40S ribosomal protein S5, putative
Tb927.4.2070	2			7			2	13	13	6	3	19	8	4455	*		antigenic protein, putative
Tb927.8.4450	2			7						5		2		428	*		RNA-binding protein, putative
Tb927.9.10790	2			6			2	2	4	2	2	3	4	200	*		hypothetical protein
Tb927.10.12840	2			6			2	2	2	24		14	2	304	*		mitochondrial carrier protein
Tb927.10.4310	2			4		2				4		4		295	*		prohibitin 2, putative
Tb927.1.3310	2			4				2				5		252			hypothetical protein, conserved
Tb927.10.15170	2			4						3		2		695	*		hypothetical protein, conserved
Tb927.11.15000	2			3			2			8		3		157	*		survival of motor neuron (SMN)-like protein
Tb927.3.2470	2			3						6		3		604			pumilio RNA binding protein, putative
Tb927.11.3100	2								2	7		4		362	*		Present in the outer mitochondrial membrane proteome 13
Tb927.11.1820	2								2			4		628	*		translation initiation factor eIF2B delta subunit, putative
Tb927.10.7060	2									6		5		883	*		nucleoporin interacting component (NUP93), putative
Tb927.10.10010	2													226	*		mRNA turnover protein 4 homolog, putative
Tb927.11.16120	2													610			hypothetical protein, conserved
Tb927.8.1410	2													777			pre-rrna-processing protein tsr1 homolog
Tb927.8.4535		10												140
Tb927.8.760		8		3						3	2			328	*		nucleolar RNA-binding protein
Tb927.8.2460		5		3								2		284			hypothetical protein, conserved
Tb927.11.4790		4												164			hypothetical protein
Tb927.9.1560		3		3										464			DnaJ domain containing protein, putative
Tb927.8.3950		3		2					2			2		914	*		hypothetical protein, conserved
Tb927.11.550		2	5		8			4	2	7	3	4	2	280	*		hypothetical protein SCD6.10
Tb927.10.1620			19		24			2	5		6	7	8	555	*		phosphoserine/threonine/tyrosine-binding protein, putative
Tb927.10.6070			11		20					5	3			140	*		universal minicircle sequence binding protein 1
Tb927.10.6060			10	5	15					6	3			213	*		universal minicircle sequence binding protein 2
Tb927.9.10400			9		24					2	4			495	*		hypothetical protein, conserved
Tb927.10.2240			6	29				3	6	18		19		588	*		hypothetical protein, conserved
Tb927.8.1510			6	2	11			4	3	13	7	7		569	*		ATP-dependent DEAD/H RNA helicase, putative
Tb927.10.6680			6		5									740			member of the NOL1/NOP2/sun family of proteins
Tb927.10.9970			6		5									1024			hypothetical protein, conserved
Tb927.10.13516			5	10										86
Tb927.9.8850			5	4	3			3	2	5		4	4	376	*		actin A
Tb927.11.11330			5	3	2		2	3	5	16		11	4	690	*		heat shock protein 70
Tb927.5.2590			4		2									265			Macro domain containing protein, putative
Tb927.11.14960			3	10						11		8		704			pumilio/PUF RNA binding protein 7, putative
Tb927.11.11080			3	9					4	14		18		1439	*		Nucleoporin
Tb927.3.3590			3	7						11		12		672	*		U3 small nucleolar ribonucleoprotein protein MPP10, putative
Tb927.9.12730			3	5	2					15		8	2	451	*		chaperone protein DNAj, putative
Tb927.10.8850			3							2				585			A distinct subfamily of CDD/CDA-like deaminases, putative
Tb927.10.1150			3											1000			hypothetical protein, conserved
Tb927.11.12210			2	18	2		4		2	8	3	5	3	291	*		Domain of unknown function (DUF4586), putative
Tb927.7.5180			2	17						5				220	*		60S ribosomal protein L23a, putative
Tb927.11.3490			2	16					2	6		6		798	*		hypothetical protein, conserved
Tb927.10.5330			2	13	2		2	4	2	3		3	4	153	*		40S ribosomal protein S18, putative
Tb927.6.4530			2	9				2	8	14		11		153	*		RNA-binding protein, putative
Tb927.9.15060			2	7						5		2		251			rRNA processing protein, putative
Tb927.7.320			2	6			4	3	8	19		11		180	*		hypothetical protein, conserved
Tb927.10.220			2	6						2		2		93	*		60S ribosomal protein L37a, putative
Tb927.11.15990			2	4				2	3	4		6		1001	*		nucleoporin Nup109
Tb927.9.8200			2	4					2	5		4		658			Pescadillo N-terminus/BRCA1 C Terminus (BRCT) domain containing protein, putative
Tb927.10.5360			2	2	2							2		172	*		40S ribosomal protein S10, putative
Tb927.7.2720			2		3									663			translation initiation factor SUI1, putative
Tb927.3.1590			2		2					5	3			668	*		mitochondrial RNA binding complex 1 subunit
Tb927.6.3710			2		2									718			hypothetical protein, conserved
Tb927.4.3840			2						2	3		5		525			nucleolar protein, putative
Tb927.10.510			2							3				334			Present in the outer mitochondrial membrane proteome 19
Tb927.10.9840			2											262	*		chaperone protein DNAj, putative
Tb927.11.13820			2											384			hypothetical protein, conserved
Tb927.1.4310				108			6		3	5		6	4	1638	*		Flagellum attachment zone protein 2
Tb927.10.14500				62			15	8	13	21		13	3	337	*		hypothetical protein, conserved
Tb927.11.12150				57			5	2			10	2		587	*		flagellar pocket cytoskeletal protein bilbo1
Tb927.10.14490				47			6	2	5	16		17		420	*		hypothetical protein, conserved
Tb927.7.4910				36			3		3	12		4		369	*		hypothetical protein, conserved
Tb927.10.15750				36			2	6	8	10		8	2	1748	*		hypothetical protein, conserved
Tb927.8.6240				35			6	2	3	14	2	12	2	266	*		STOP axonemal protein
Tb927.11.3710				33			7	2		8		8		515	*		hypothetical protein, conserved
Tb927.10.560				31				8	6	7	6	8	7	174	*		40S ribosomal proteins S11, putative
Tb927.11.9730				30					3	3				170	*		60S ribosomal protein L34, putative
Tb927.8.6070				30										1412			Trypanosome basal body component protein
Tb927.4.4690				29			3			7		2		278			hypothetical protein, conserved
Tb927.4.4700				28			5		2	8		6		269	*		hypothetical protein, conserved
Tb927.3.3300				28			3	3	6	3		18	3	814	*		Flagellum attachment zone protein 19
Tb927.11.8950				28			2					3		713	*		leucine rich repeat
Tb927.11.8200				28				2	2	3		5	2	111	*		ribosomal protein S26, putative
Tb927.10.3940				28					7	6		15		256	*		40S ribosomal protein S3A, putative
Tb927.3.4290				27			3	5	8	10	5	9	5	589	*		Paraflagellar rod protein 1-1
Tb927.3.2310				27			2			5		3		300	*		PACRGA
Tb927.11.3250				26			2	2	4	4		6	4	4658	*		dynein heavy chain, putative
Tb927.1.3180				26				8	5	5	4	7	5	174	*		40S ribosomal protein S11, putative
Tb927.11.14020				26						4		6		279	*		nuclear RNA binding domain 2
Tb927.9.3990				25						8		4	3	202	*		ribosomal protein S7, putative
Tb927.1.1100				25										970			conserved protein, unknown function
Tb927.6.4520				24						6		7		436			Tumour suppressor, Mitostatin, putative
Tb927.9.15360				24						2		6		250	*		40S ribosomal protein S6, putative
Tb927.10.3010				24										1223			hook complex protein, conserved
Tb927.11.8390				24										421			hypothetical protein, conserved
Tb927.9.3920				23		2	2	2		7		4	3	202	*		ribosomal protein S7, putative
Tb927.11.6460				23			5	2	2	3		7	3	954	*		hypothetical protein, conserved
Tb927.11.5640				23										924			hypothetical protein, conserved
Tb927.8.4640				22			6	2	5	12		10		385	*		flagellar protofilament ribbon protein, putative
Tb927.11.14000				22								7		262	*		nuclear RNA binding domain 1
Tb927.5.1230				20			3			7		5		483			hypothetical protein, conserved
Tb927.10.8820				20			2							766			hook complex protein, conserved
Tb927.10.190				20					2	2		4		250	*		40S ribosomal protein S6, putative
Tb927.6.4690				20						9		10		187	*		60S ribosomal protein L9, putative
Tb927.10.5990				20										443			hypothetical protein, conserved
Tb927.11.4820				19				5	3	4	4	6	3	166	*		60S ribosomal protein L17, putative
Tb927.11.7470				19					3	2		5		247			hypothetical protein, conserved
Tb927.7.6640				18			5	3	4	5		11		1617	*		hypothetical protein, conserved
Tb927.11.8030				18			5	2	6	8		12		417			hypothetical protein, conserved
Tb927.11.15880				18			2		2	7		7		133	*		60S ribosomal protein L27, putative
Tb927.9.12200				18						3		2		188	*		60S ribosomal subunit protein L31, putative
Tb927.10.1080				18						2		4		143	*		40S ribosomal protein S23, putative
Tb927.11.11820				17		2						4		142	*		40S ribosomal protein S17, putative
Tb927.9.1980				17			5	4	4	11		8		692	*		hypothetical protein, conserved
Tb927.3.5020				17			4	4	5	5		9		1413	*		Flagellar Member 6
Tb927.7.5660				17			2			10		4		575	*		hypothetical protein, conserved
Tb927.10.5610				17						7		9		190	*		40S ribosomal protein S9, putative
Tb927.11.10030				17						2		2		71	*		60S ribosomal protein L29, putative
Tb927.8.7080				17										1521	*		hypothetical protein, conserved
Tb927.11.3360				16					2	9		4		909			ATPase family associated with various cellular activities (AAA), putative
Tb927.11.4920				16					2	4		3		272			hypothetical protein, conserved
Tb927.10.14520				16										466			hypothetical protein, conserved
Tb927.6.3330				16										297			hypothetical protein, conserved
Tb927.11.6530				15			4		2	4		5		415	*		hypothetical protein, conserved
Tb927.11.7560				15			2		2	8		3		629			predicted WD40 repeat protein
Tb927.11.4880				15			2		2	3		6		274			Calmodulin-binding, putative
Tb927.11.13020				15				2	4			9	2	149	*		calmodulin
Tb927.10.1590				15					2	2		7		109	*		ribosomal protein L36, putative
Tb927.5.1690				15						4		2		462			hypothetical protein, conserved
Tb927.9.14370				15								4		143	*		60S ribosomal protein L26, putative
Tb927.10.5030				15										151	*		ubiquitin/ribosomal protein S27a, putative
Tb927.10.5910				15										756			hypothetical protein, conserved
Tb927.2.5010				15										500			Meiotic cell cortex C-terminal pleckstrin homology, putative
Tb927.7.6910				14			4			3		2		823			Phosphatidylinositol 4-phosphate 5-kinase, putative
Tb927.3.1900				14			3			4				867			hypothetical protein, conserved
Tb927.3.5010				14			2			4		2		193			hypothetical protein, conserved
Tb927.2.4400				14					15	38		21		1181	*		hypothetical protein, conserved
Tb927.8.3250				14					4	8				4674			dynein heavy chain, putative
Tb927.11.5000				14						6		2		655			Dynein intermediate chain 1, axonemal
Tb927.11.4480				13			2		3	4		5		585	*		Flagellar radial spoke protein 4/6
Tb927.9.9210				13					2	2		3	2	84	*		60S ribosomal protein L37, putative
Tb927.7.3920				13						2				320			hypothetical protein, conserved
Tb927.10.3280				13										82	*		60S ribosomal proteins L38, putative
Tb927.5.570				13										2127			hypothetical protein, conserved
Tb927.8.4050				13										750			FLA1-binding protein
Tb927.3.3200				12			2		3	7		12		350	*		Domain of unknown function (DUF4586), putative
Tb927.4.2840				12			2			3				249			hypothetical protein, conserved
Tb927.10.840				12				3	2			4		1719			Flagellum attachment zone protein 6
Tb927.3.4970				12				2	3	9		3		1063			hypothetical protein, conserved
Tb927.7.990				12				2	2	19		16	2	778	*		chaperone protein DNAj, putative
Tb927.10.14330				12					2	12		13		1040	*		Utp14 protein, putative
Tb927.9.8240				12					2	2		2		535			hypothetical protein, conserved
Tb927.10.14750				12						31		10		304	*		fibrillarin, putative
Tb927.7.920				12						3		4		4112			Inner arm dynein 5-1
Tb927.11.10620				12						3				191			hypothetical protein, conserved
Tb927.3.3690				12										548			flagellar radial spoke protein-like, putative
Tb927.6.4230				12										500			hypothetical protein, conserved
Tb927.8.4010				12										546			Flagellum adhesion protein 1
Tb927.8.940				11			2							2194			hypothetical protein, conserved
Tb927.11.9720				11				2		3		3		86	*		40S ribosomal protein S27, putative
Tb927.6.3150				11					2	3				4521			Hydin
Tb927.9.15190				11						7		8		221	*		ribosomal protein L15, putative
Tb927.7.3740				11						5		2		849			hypothetical protein, conserved
Tb927.5.4150				11						3		2		386			hypothetical protein, conserved
Tb927.9.4250				11						3		2		371			hypothetical protein, conserved
Tb927.10.15000				11								3		422			hypothetical protein, conserved
Tb927.10.12720				11										902	*		hypothetical protein, conserved
Tb927.10.11250				11										872			Coiled-coil domain-containing protein 40 homolog
Tb927.4.2820				11										1001			hypothetical protein, conserved
Tb927.8.2590				11										545			hypothetical protein, conserved
Tb927.11.3300				10	2			7	5	5	32	3		932			Spindle assembly abnormal 4
Tb927.5.2950				10			3		2	3		3		779			Repeat of unknown function (DUF1126), putative
Tb927.11.16090				10			2			2		3		634			outer dynein arm docking complex, putative
Tb927.7.3380				10					3	10		6		276	*		Ribosomal L28e protein family/Mak16 protein C-terminal region, putative
Tb927.11.14300				10					2	4		3		602			Dynein intermediate chain, axonemal
Tb927.11.7705				10						3		5		144			ribosomal protein S11, putative
Tb927.9.11140				10						2		3		476			hypothetical protein, conserved
Tb927.10.2860				10						2				780			WD domain, G-beta repeat, putative
Tb927.11.3500				10										1017			Dpy-30 motif containing protein, putative
Tb927.11.5030				10										314			hypothetical protein, conserved
Tb927.9.15230				10										418			hypothetical protein, conserved
Tb927.9.3580				10										579			hypothetical protein, conserved
Tb927.10.8980				9	2									169	*		hypothetical protein, conserved
Tb927.10.2380				9			3			11		3	2	916	*		Tetratricopeptide repeat, putative
Tb927.10.7690				9			2			5				724			rib72 protein- like protein
Tb927.9.1750				9					6	11		14	2	4479	*		Fibronectin type III domain containing protein, putative
Tb927.9.10530				9						4		5		1043			Flagellum attachment zone protein 4
Tb927.8.6230				9						3		7		329			hypothetical protein, conserved
Tb927.11.10800				9						3				262			Domain of unknown function (DUF4496), putative
Tb927.4.870				9						3				4448			dynein heavy chain, putative
Tb927.9.1810				9						2		2	3	127	*		60S ribosomal protein L35, putative
Tb927.10.14570				9						2				718			kinesin motor domain containing protein, putative
Tb927.10.15120				9							2		2	151	*		40S ribosomal protein S13, putative
Tb927.3.1040				9								4		398
Tb927.11.10790				9										244	*		40S ribosomal protein SA, putative
Tb927.10.10090				9										1086			hypothetical protein, conserved
Tb927.10.4820				9										341			hypothetical protein, conserved
Tb927.10.7600				9										365			hypothetical protein, conserved
Tb927.3.2760				9										1558			hypothetical protein, conserved
Tb927.5.3630				9										411			hypothetical protein, conserved
Tb927.8.1300				9										722			hypothetical protein, conserved
Tb927.11.9100				8			3			9		7		286	*		Domain of unknown function (DUF4586), putative
Tb927.8.2620				8			3			6		2		834	*		hypothetical protein, conserved
Tb927.9.8190				8			2			3				254			hypothetical protein, conserved
Tb927.6.1500				8				3	2	9		10		613			alkyl-dihydroxyacetone phosphate synthase
Tb927.11.16400				8						18		11		324	*		kinetoplast-associated protein 3, putative
Tb927.9.5590				8						7		7		1221			DNA topoisomerase ii
Tb927.8.4870				8						7				1204			DIGIT
Tb927.2.4810				8						5		4		1340			hypothetical protein, conserved
Tb927.11.1150				8						4				332			radial spoke protein 3
Tb927.5.500				8						3		4		1403			hypothetical protein, conserved
Tb927.8.8200				8						3				856			hypothetical protein, conserved
Tb927.11.3230				8						2		5		106	*		60S ribosomal protein L44
Tb927.11.10090				8						2		4		415			hypothetical protein, conserved
Tb927.8.3870				8						2		4		1205			SRP40, C-terminal domain containing protein, putative
Tb927.11.2790				8						2		2		709			Solute carrier (proton/amino acid symporter), TRAMD3 or PAT1, putative
Tb927.9.9940				8								2		312			PACRGB
Tb927.2.2530				8										832			hypothetical protein, conserved
Tb927.7.7190				8										1318			hypothetical protein, conserved
Tb927.8.1070				8										884			hypothetical protein, conserved
Tb927.8.7060				8										1578			hypothetical protein, conserved
Tb927.8.4810				7			2	5	5	10	5	8	2	277	*		prohibitin 1
Tb927.10.3810				7				2	3	7		12		595			Nup53/35/40-type RNA recognition motif containing protein, putative
Tb927.3.3180				7					4			6		992			Nucleoporin
Tb927.11.9080				7					3	14		7		1216	*		AARP2CN (NUC121) domain/Protein of unknown function (DUF663), putative
Tb927.11.12560				7					2			2		784			hypothetical protein
Tb927.5.1560				7						12		11		753	*		ATP-dependent DEAD/H RNA helicase, putative
Tb927.10.3310				7						9		3		946			hypothetical protein, conserved
Tb927.11.6360				7						7		7		191	*		60S ribosomal protein L24, putative
Tb927.3.3670				7						6		5		623			Triple RNA binding domain protein 3
Tb927.8.4400				7						6				668			hypothetical protein, conserved
Tb927.11.10900				7						5		2		848			MENG
Tb927.11.4000				7						3				581			hypothetical protein, conserved
Tb927.11.3840				7						2		5		462			hypothetical protein, conserved
Tb927.5.2850				7						2		4		518			radial spoke protein RSP2, putative
Tb927.10.6490				7						2				161			KIAA1430 homologue, putative
Tb927.9.5410				7						2				297			hypothetical protein, conserved
Tb927.7.5240				7								3		490			hypothetical protein, conserved
Tb927.11.16890				7								2		2059			Tetratricopeptide-like helical domain containing protein
Tb927.5.1900				7								2		682			hypothetical protein, conserved
Tb927.7.3330				7								2		4334			Flagellar attachment zone protein 10
Tb927.1.990				7										374			Enkuring domain-containig protein
Tb927.10.3020				7										773			hypothetical protein, conserved
Tb927.10.850				7										1502			hook complex protein, conserved
Tb927.11.9540				7										552			hypothetical protein, conserved
Tb927.2.5000				7										406			hypothetical protein, conserved
Tb927.2.5270				7										4246			dynein heavy chain, putative
Tb927.3.3350				7										583			hypothetical protein, conserved
Tb927.3.4960				7										1594			kinesin, putative
Tb927.3.5160				7										1232			hypothetical protein, conserved
Tb927.7.3560				7										1760			hypothetical protein, conserved
Tb927.8.6260				7										947			hypothetical protein, conserved
Tb927.9.10550				7										726			Spindle assembly abnormal protein 6 homolog
Tb927.9.11690				7										660			hypothetical protein, conserved
Tb927.9.2520				6			2			2		5		8214			microtubule-associated protein
Tb927.7.4870				6			2							270			hypothetical protein, conserved
Tb927.10.13740				6				2	6	4		11	2	594	*		synaptotagmin, putative
Tb927.9.2900				6				2	3	11		10	2	2631	*		hypothetical protein, conserved
Tb927.10.4080				6					6	6		13		1183			hypothetical protein, conserved
Tb927.11.13005				6					5					128
Tb927.10.2700				6					2	19		16		696	*		predicted WD40 repeat protein
Tb927.11.2120				6					2	9		8		788			CBF/Mak21 family, putative
Tb927.4.2600				6						7		3		1628			hypothetical protein, conserved
Tb927.11.8050				6						6		6		523			Sas10/Utp3/C1D family/Sas10 C-terminal domain containing protein, putative
Tb927.7.3980				6						4		3		904	*		immunodominant antigen, putative
Tb927.10.6960				6						4				320			hypothetical protein, conserved
Tb927.2.450				6						3		4		857			retrotransposon hot spot protein 4 (RHS4), putative
Tb927.9.15050				6						3				461	*		nexin-dynein regulatory complex 4
Tb927.5.3970				6						3				260			adenylate kinase, putative
Tb927.1.4180				6						2				744			leucine-rich repeat protein (LRRP), putative
Tb927.4.4130				6						2				856			hypothetical protein, conserved
Tb927.8.5300				6						2				562			hypothetical protein, conserved
Tb927.10.8780				6								2		2169			AAA domain containing protein, putative
Tb927.6.620				6								2		2728			hypothetical protein, conserved
Tb927.10.12410				6										228			hypothetical protein, conserved
Tb927.10.14770				6										640			Associated kinase of Tb14-3-3
Tb927.10.15440				6										285			hypothetical protein, conserved
Tb927.10.2650				6										1175			hypothetical protein, conserved
Tb927.10.5350				6										4142			dynein heavy chain, putative
Tb927.10.630				6										657			hypothetical protein, conserved
Tb927.10.8710				6										165			centrin-3
Tb927.10.8830				6										585			Flagellum attachment zone protein 5
Tb927.11.1220				6										780			hypothetical protein, conserved
Tb927.11.15130				6										319			DnaJ homolog, putative
Tb927.11.15220				6										301			hypothetical protein, conserved
Tb927.11.2540				6										297			hypothetical protein, conserved
Tb927.11.5510				6										235			dynein light chain p28, axonemal, putative
Tb927.3.1670				6										1027			hypothetical protein, conserved
Tb927.3.2890				6										322			radial spoke protein RSP10, putative
Tb927.4.1740				6										422			hypothetical protein, conserved
Tb927.5.3460				6										537			hypothetical protein, conserved
Tb927.7.6250				6										426			hypothetical protein, conserved
Tb927.8.1080				6										196			centrin, putative
Tb927.11.720				5			2		4	2		6	2	264			hypothetical protein, conserved
Tb927.11.13690				5			2							196			Radial spoke protein 11
Tb927.11.14880				5				3				2		371			Paraflagellar Rod Proteome Component 9, putative
Tb927.11.10150				5					8	8		6		1211			Enoyl-CoA hydratase/isomerase family, putative
Tb927.7.4760				5					3	4		4	2	539	*		hypothetical protein, conserved
Tb927.5.2990				5					3		3		3	254	*		hypothetical protein, conserved
Tb927.11.10370				5					2	5		11		1055			glycosyl hydrolase-like protein
Tb927.11.11860				5					2			3		715			leucine-rich repeat protein (LRRP), putative
Tb927.10.7500				5						16		7		300			fibrillarin
Tb927.3.3130				5						10		13	2	1642	*		Present in the outer mitochondrial membrane proteome 24
Tb927.10.7350				5						9		5		1794			hypothetical protein, conserved
Tb927.10.13180				5						6		7		1236			Nrap protein, putative
Tb927.9.11540				5						4		5		438	*		xxx Hilton 2018, posterior, hypothetical protein, conserved
Tb927.7.650				5						4		4		984			hypothetical protein, conserved
Tb927.11.2250				5						4		3		241	*		conserved protein, unknown function
Tb927.11.11220				5						4				4242			dynein heavy chain, putative
Tb927.9.13350				5						3		6		337			hypothetical protein, conserved
Tb927.10.7810				5						3		5		712			hypothetical protein, conserved
Tb927.4.4370				5						3		3		590			hypothetical protein, conserved
Tb927.7.2790				5						3		2		701			hypothetical protein, conserved
Tb927.8.4290				5						2				191	*		Ribosome biogenesis protein Nop16, putative
Tb927.11.3880				5						2				433			actin, putative
Tb927.4.790				5						2				220			hypothetical protein, conserved
Tb927.7.3310				5						2				356			hypothetical protein, conserved
Tb927.8.4460				5						2				1009			Domain of Unknown Function (DUF1042), putative
Tb927.5.3730				5							3			577			hypothetical protein, conserved
Tb927.8.1550				5								3		778			paraflagellar rod component, putative
Tb927.11.3770				5								2		262			Dpy-30 motif containing protein, putative
Tb927.4.1680				5								2		469			ZFP family member, putative
Tb927.11.6500				5										196	*		40S ribosomal protein S21, putative
Tb927.1.4400				5										288			hypothetical protein, conserved
Tb927.10.5260				5										1135			C2 domain containing protein, putative
Tb927.10.7510				5										489			chromatin binding protein, putative
Tb927.11.10120				5										865			hypothetical protein, conserved
Tb927.11.13700				5										754			hypothetical protein, conserved
Tb927.11.14650				5										1116			hypothetical protein, conserved
Tb927.11.14800				5										473			hypothetical protein, conserved
Tb927.11.8160				5										4152			dynein heavy chain, putative
Tb927.11.9680				5										596			hypothetical protein, conserved
Tb927.3.4510				5										1331			hypothetical protein, conserved
Tb927.4.1890				5										224			hypothetical protein, conserved
Tb927.4.3740				5										1692			flagellar attachment zone protein 1
Tb927.6.4100				5										797			hypothetical protein, conserved
Tb927.7.4370				5										1388			hypothetical protein, conserved
Tb927.7.7400				5										2197			hypothetical protein, conserved
Tb927.8.2870				5										934			conserved protein
Tb927.8.6300				5										485			hypothetical protein, conserved
Tb927.8.6370				5										444			cytoskeleton associated protein, putative
Tb927.8.810				5										333			radial spoke protein RSP9, putative
Tb927.9.4760				5										350			Protein of unknown function (DUF3128), putative
Tb927.4.3130				4			2			3				275			Spef1
Tb927.9.6460				4				3	6	3		6		1520	*		hypothetical protein, conserved
Tb927.8.5200				4					5	8		7		1788			hypothetical protein, conserved
Tb927.10.1560				4					4	8		4		827			hypothetical protein, conserved
Tb927.7.6670				4					3	12		20		3030	*		hypothetical protein, conserved
Tb927.1.4100				4					3	7		8		353	*		cytochrome oxidase subunit IV
Tb927.4.4950				4					3	4		4		570			hypothetical protein, conserved
Tb927.11.15140				4					3					568			bilobe region protein, putative
Tb927.10.1510				4					2	12		12		2326	*		CCR4-NOT transcription complex subunit 1
Tb927.10.7710				4					2	4	2	4		260	*		40S ribosomal protein S8, putative
Tb927.10.14180				4					2	2		5		374			protein transport protein SEC13, putative
Tb927.11.2510				4						15		8		1292	*		NUC173 domain containing protein, putative
Tb927.10.3790				4						13		16		3901	*		hypothetical protein, conserved
Tb927.11.3120				4						10		7		655	*		nucleolar GTP-binding protein 1
Tb927.10.1720				4						10		6		596	*		ATP-dependent DEAD/H RNA helicase, putative
Tb927.11.12890				4						7		10		1251	*
Tb927.5.3850				4						6		5		891			XRN 5'-3' exonuclease N-terminus, putative
Tb927.10.7120				4						5		6		325			hypothetical protein, conserved
Tb927.8.7470				4						5		3		570			hypothetical protein, conserved
Tb927.8.5490				4						5		2		623			Nucleolar protein,Nop52, putative
Tb927.4.3670				4						4		9		457			CBF/Mak21 family, putative
Tb927.2.3020				4						4				1032			hypothetical protein, conserved
Tb927.6.3630				4						4				538			sphingosine 1-phosphate lyase, putative
Tb927.8.2600				4						3		3		646			WD domain, G-beta repeat/BING4CT (NUC141) domain containing protein, putative
Tb927.10.7880				4						3				651			Sperm tail/Sperm tail C-terminal domain containing protein, putative
Tb927.10.770				4						2		4		632	*		RF-1 domain containing protein, putative
Tb927.2.340				4						2		3		858			retrotransposon hot spot protein 4 (RHS4), putative
Tb927.10.6920				4						2				320			hypothetical protein
Tb927.6.640				4						2				734			kinetoplastid-specific phospho-protein phosphatase, putative
Tb927.7.7240				4						2				717			leucine-rich repeat protein (LRRP), putative
Tb927.4.1860				4								2		167	*		ribosomal protein S19, putative
Tb927.10.14010				4								2		463			tubulin cofactor C domain-containing protein RP2
Tb927.11.13230				4								2		216			MSP (Major sperm protein) domain containing protein, putative
Tb927.11.1960				4								2		415			leucine-rich repeat protein (LRRP), putative
Tb927.4.1670				4								2		153			cytochrome b5-like Heme/Steroid binding domain containing protein, putative
Tb927.7.2650				4								2		537			hypothetical protein, conserved
Tb927.9.11260				4								2		334			nucleoside diphosphate kinase, putative
Tb927.9.13340				4										311	*		Nop53 (60S ribosomal biogenesis), putative
Tb927.9.2020				4										82	*		60S ribosomal protein L38, putative
Tb927.10.14610				4										1103			leucine-rich repeat protein (LRRP), putative
Tb927.10.15660				4										779			hypothetical protein, conserved
Tb927.10.5630				4										185			hypothetical protein, conserved
Tb927.11.10430				4										568			hypothetical protein, conserved
Tb927.11.10490				4										605			hypothetical protein, conserved
Tb927.11.11810				4										1094			hypothetical protein, conserved
Tb927.11.15310				4										742			hypothetical protein, conserved
Tb927.11.4710				4										442			hypothetical protein, conserved
Tb927.11.6050				4										1707			Flagellar-associated PapD-like, putative
Tb927.11.610				4										356			hypothetical protein, conserved
Tb927.11.6810				4										980			tubulin-tyrsoine ligase-like protein, putative
Tb927.2.4160				4										835			hypothetical protein, conserved
Tb927.4.5380				4										1460			hypothetical protein, conserved
Tb927.4.620				4										2503			hypothetical protein, conserved
Tb927.5.2970				4										830			suppressive immunomodulating factor
Tb927.6.1770				4										628			kinesin, putative
Tb927.7.1310				4										1347			hypothetical protein, conserved
Tb927.7.4460				4										842			von Willebrand factor type A domain containing protein, putative
Tb927.7.5050				4										973			hypothetical protein, conserved
Tb927.7.7030				4										651			zinc-finger of a C2HC-type, putative
Tb927.7.760				4										569			hypothetical protein, conserved
Tb927.8.5400				4										941			hypothetical protein, conserved
Tb927.8.610				4										881			hypothetical protein, conserved
Tb927.8.6660				4										607			paraflagellar rod component, putative
Tb927.8.7800				4										1200			hypothetical protein, conserved
Tb927.9.9140				4										426			hypothetical protein, conserved
Tb927.9.9280				4										566			hypothetical protein, conserved
Tb927.11.7240				3			2			4				507			nexin-dynein regulatory complex 2
Tb927.11.15190				3			2			2				682			Domain of unknown function (DUF4200), putative
Tb927.10.9720				3				5	5		6	6	9	591	*		RNA-editing-associated protein 1
Tb927.10.11760				3				3	10	16		20		843	*		pumilio/PUF RNA binding protein 6
Tb927.10.9650				3				3	3	6		7		1406	*		hypothetical protein, conserved
Tb927.11.460				3				2		12		5		948			predicted WD40 repeat protein
Tb927.4.4940				3					15	30		35		669	*		hypothetical protein, conserved
Tb927.11.980				3					3	7		6		1553	*		Nuclear pore complex protein 158
Tb927.7.4900				3					2	8		4		1418			5'-3' exoribonuclease A
Tb927.9.12550				3					2	6	3	4		512	*		glycerol kinase, glycosomal
Tb927.6.2050				3					2	4		7		213	*		ribosome biogenesis regulatory protein (RRS1), putative
Tb927.3.4260				3					2	3		4		368			Acyl-coenzyme A thioesterase, putative
Tb927.5.2140				3						13		5		842	*		regulator of nonsense transcripts 1
Tb927.10.9700				3						10		6		1181			predicted C2 domain protein
Tb927.10.15380				3						8		6		346	*		U3 snoRNA-associated protein UTP11, putative
Tb927.5.2530				3						8				1039	*		RNA cytidine acetyltransferase
Tb927.10.3920				3						5		3		488			hypothetical protein, conserved
Tb927.7.640				3						4		4		334			hypothetical protein, conserved
Tb927.9.9550				3						4		4		177			hypothetical protein, conserved
Tb927.7.7450				3						3		3		601	*		GTP-binding protein, putative
Tb927.10.9640				3						3				341			hypothetical protein, conserved
Tb927.5.1940				3						3				191			hypothetical protein, conserved
Tb927.3.4920				3						2		5		378	*		LETM1 and EF-hand domain-containing protein 1, putative
Tb927.9.15420				3						2				132	*		60S ribosomal protein L32
Tb927.11.2270				3						2				809			inner dynein arm I1 intermediate chain, axonemal
Tb927.11.5680				3						2				210			dynein light chain, putative
Tb927.11.9400				3						2				887			hypothetical protein, conserved
Tb927.7.3420				3						2				112			peptidyl-prolyl cis-trans isomerase, putative
Tb927.7.6290				3						2				891			kinesin, putative
Tb927.7.7250				3						2				1317			Ankyrin repeats (3 copies), putative
Tb927.11.1360				3								3		568			zinc-finger of a C2HC-type, putative
Tb927.8.5710				3								3		918			recombination initiation protein NBS1, putative
Tb927.1.410				3								2		581			retrotransposon hot spot protein (RHS, pseudogene), putative
Tb927.4.4310				3								2		623			Nucleoporin
Tb927.11.10160				3										130	*		60S ribosomal protein L22, putative
Tb927.11.7675				3										117	*		ribosomal protein S10p/S20
Tb927.1.4010				3										1249			primase 2
Tb927.1.4800				3										467			hypothetical protein, conserved
Tb927.10.10080				3										146			hypothetical protein, conserved
Tb927.10.10290				3										182			hypothetical protein, conserved
Tb927.10.11800				3										373			Axonemal inner arm dynein light chain, putative
Tb927.10.3000				3										785			hypothetical protein, conserved
Tb927.10.5870				3										456			hypothetical protein, conserved
Tb927.10.7730				3										383			Domain of unknown function (DUF4496), putative
Tb927.10.7960				3										155			hypothetical protein, conserved
Tb927.10.8000				3										1329			hypothetical protein, conserved
Tb927.10.8590				3										1278			flagellum transition zone component
Tb927.10.970				3										1756			Tetratricopeptide repeat, putative
Tb927.11.10110				3										394			actin-like protein, putative
Tb927.11.10540				3										855			hypothetical protein, conserved
Tb927.11.11320				3										266			hypothetical protein, conserved
Tb927.11.13670				3										1624			hypothetical protein, conserved
Tb927.11.16450				3										133			hypothetical protein, conserved
Tb927.11.2140				3										1113			cyclic nucleotide-binding domain containing protein, putative
Tb927.11.6560				3										404			hypothetical protein, conserved
Tb927.11.9290				3										763			Flagellum attachment zone protein 20
Tb927.2.5950				3										530			hypothetical protein, conserved
Tb927.3.1740				3										683			hypothetical protein, conserved
Tb927.3.2490				3										963			hypothetical protein, conserved
Tb927.3.4980				3										551			hypothetical protein, conserved (pseudogene)
Tb927.4.1040				3										166			hypothetical protein, conserved
Tb927.4.1720				3										349			Nucleoside diphosphate kinase 3
Tb927.4.2260				3										182			centrin, putative
Tb927.4.2400				3										1428			hypothetical protein, conserved
Tb927.4.3470				3										601			hypothetical protein, conserved
Tb927.4.4180				3										832			hypothetical protein, conserved
Tb927.5.4470				3										845			hypothetical protein, conserved
Tb927.5.4480				3										579			paraflagellar rod component par4, putative
Tb927.6.5030				3										552			Component of motile flagella protein 46
Tb927.7.4510				3										407			Domain of unknown function (DUF4201), putative
Tb927.7.5690				3										608			hypothetical protein, conserved
Tb927.8.1560				3										616			hypothetical protein, conserved
Tb927.8.3590				3										652			hypothetical protein, conserved
Tb927.8.4310				3										648			hypothetical protein, conserved
Tb927.8.4910				3										114			hypothetical protein, conserved
Tb927.8.5960				3										165			hypothetical protein, conserved
Tb927.8.7070				3										316			Flagellum attachment zone protein 15
Tb927.9.14290				3										468			Cytokinesis initiation factor 2
Tb927.9.5040				3										930			cAMP-specific phosphodiesterase
Tb927.9.8760				3										2324			hypothetical protein, conserved
Tb927.8.3750				2	2				2	17		11		483	*		nucleolar protein 56, putative
Tb927.11.10760				2			6			3		4		617			kinesin-D
Tb927.8.2630				2			5			7		3		750			kinesin-C
Tb927.10.9570				2				4	9	8		7	2	1082	*		paraflagellar rod component, putative
Tb927.2.5530				2				4	7	9		12	2	1522	*		Present in the outer mitochondrial membrane proteome 22-1
Tb927.11.13270				2				4	5	3		3		270			hypothetical protein, conserved
Tb927.11.6440				2				3	4	3		5		441			hypothetical protein, conserved
Tb927.8.1990				2				3	3	2		2		226			peroxidoxin
Tb927.9.5750				2				3		8		4		199	*
Tb927.5.4040				2					4	6		5		817			hypothetical protein, conserved
Tb927.10.15830				2					4			5		266			hypothetical protein, conserved
Tb927.11.1250				2					3	3		2		874	*		Mitochondrial SSU ribosomal protein, putative
Tb927.10.5640				2					2	11		6		495			hypothetical protein, conserved
Tb927.9.9290				2					2	8		5		566	*		polyadenylate-binding protein 1
Tb927.7.4220				2					2	7		7		1110			WD domain, G-beta repeat/Dip2/Utp12 Family, putative
Tb927.7.700				2					2	6		3		666			hypothetical protein, conserved
Tb927.2.2950				2					2	4		5		955			Nop14-like family, putative
Tb927.10.11900				2					2	3		4		167			thioredoxin, putative
Tb927.8.1980				2					2	3		4		477			Beta propeller protein 1
Tb927.10.8010				2					2	2		4		244			hypothetical protein, conserved
Tb927.10.4880				2					2	2		2		224	*		hypothetical protein, conserved
Tb927.10.270				2					2		2			132	*		60S ribosomal protein L32, putative
Tb927.5.1120				2					2					6062			Phage tail fibre repeat, putative
Tb927.6.740				2						17		7		1251			ATP-dependent DEAH-box RNA helicase, putative
Tb927.7.2070				2						14		4		328	*		heat shock protein DNAJ, putative
Tb927.11.4540				2						8		4		453			nucleoporin 48
Tb927.5.760				2						7		8		740			cell cycle sequence binding phosphoprotein (RBP33), putative
Tb927.6.3670				2						6		3		3222			paraflagellar rod component, putative
Tb927.8.1010				2						6		2		490			chaperone protein DNAj, putative
Tb927.10.5300				2						5		5		248	*		eukaryotic translation initiation factor 6 (eIF-6), putative
Tb927.9.10310				2						5		3		317	*		mitochondrial carrier protein 11
Tb927.6.2780				2						5		2		287			U3 small nuclear ribonucleoprotein (snRNP), putative
Tb927.9.12070				2						5				995			hypothetical protein, conserved
Tb927.5.560				2						4		5		493			hypothetical protein, conserved
Tb927.7.210				2						4		4		556	*		Proline dehydrogenase, mitochondrial
Tb927.10.6220				2						4				801			5'-3' exoribonuclease D
Tb927.11.8870				2						4				546			DEAD-box ATP-dependent RNA helicase, mitochondrial
Tb927.11.10200				2						3		6		490	*		hypothetical protein, conserved
Tb927.7.6790				2						3		6		537			hypothetical protein, conserved
Tb927.11.3830				2						3		5		354	*		hypothetical protein, conserved
Tb927.11.13930				2						3		4		226	*		U3 small nucleolar ribonucleoprotein protein IMP3, putative
Tb927.9.11250				2						3		3		444			predicted WD40 repeat protein
Tb927.10.12430				2						3		2		649			Noc2p family, putative
Tb927.11.14750				2						3		2		372			PSP1 C-terminal conserved region, putative
Tb927.11.4980				2						3		2		601			ATP-dependent DEAD/H RNA helicase, putative
Tb927.11.7310				2						3		2		294			RNA binding protein, putative
Tb927.1.2230				2						3				123			small myristoylated protein 1-1
Tb927.5.3120				2						2		5		313			eukaryotic translation initiation factor 2 beta subunit, putative
Tb927.9.7670				2						2		4		235	*		hypothetical protein, conserved
Tb927.1.1700				2						2		3		493			AATF protein, putative
Tb927.11.540				2						2		3		691			ABC transporter, mitochondrial, putative
Tb927.2.4060				2						2		2		864			dynein intermediate chain IC 138, putative
Tb927.7.6890				2						2		2		254			methyltransferase domain containing protein, putative
Tb927.9.9230				2						2		2		169			hypothetical protein, conserved
Tb927.1.2260				2						2				129			small myristoylated protein 1-2
Tb927.1.4340				2						2				716			hypothetical protein, conserved
Tb927.10.2190				2						2				294			Protein of unknown function (DUF667), putative
Tb927.11.13660				2						2				135			hypothetical protein, conserved
Tb927.11.13810				2						2				556			ATP- dependent RNA helicase, putative
Tb927.11.9440				2						2				552			hypothetical protein, conserved
Tb927.6.630				2						2				730			hypothetical protein, conserved
Tb927.8.5020				2						2				443			hypothetical protein, conserved
Tb927.10.14820				2								7		307	*		Mitochondrial ADP/ATP carrier protein 5c
Tb927.11.15665				2								3		65
Tb927.11.8800				2								3		277			hypothetical protein, conserved
Tb927.11.15100				2								2		1172			Tb5.20
Tb927.3.1190				2								2		2327			hypothetical protein, conserved
Tb927.8.8000				2								2		542			hypothetical protein, conserved
Tb927.10.4110				2										105	*		60S ribosomal protein L30
Tb927.10.6640				2										253	*		transmembrane emp24 domain-containing protein
Tb927.11.6140				2										130	*		40S ribosomal protein S15A, putative
Tb927.7.1040				2										149	*		40S ribosomal protein S16, putative
Tb927.7.2340				2										152	*		40S ribosomal protein S15, putative
Tb927.8.5260				2										51	*		60S ribosomal protein L39, putative
Tb927.1.1920				2										441			conserved protein, unknown function
Tb927.10.1130				2										274			dynein arm light chain, axonemal, putative
Tb927.10.11990				2										215			RNA-binding protein
Tb927.10.12950				2										959			hypothetical protein, conserved
Tb927.10.13330				2										1348			paraflagellar rod component, putative
Tb927.10.13550				2										1046			hypothetical protein, conserved
Tb927.10.14340				2										1173			hypothetical protein, conserved
Tb927.10.15190				2										660			hypothetical protein, conserved
Tb927.10.15390				2										1095			Flagellum attachment zone protein 7
Tb927.10.15930				2										485			pdz domain containing protein, putative
Tb927.10.2320				2										381			hypothetical protein, conserved
Tb927.10.250				2										723			hypothetical protein, conserved
Tb927.10.3820				2										2147			hypothetical protein, conserved
Tb927.10.4170				2										2539			hypothetical protein, conserved
Tb927.10.4890				2										301			zinc-finger of a C2HC-type, putative
Tb927.10.5430				2										281			Flagellar C1a complex subunit C1a-32, putative
Tb927.10.6230				2										690			MORN repeat containing protein
Tb927.10.6350				2										453			trypanin
Tb927.10.6670				2										125			dynein light chain, putative
Tb927.10.7210				2										228			hypothetical protein, conserved
Tb927.10.8930				2										710			paraflagellar rod component, putative
Tb927.10.9060				2										471			hypothetical protein, conserved
Tb927.10.9980				2										341			hypothetical protein, conserved
Tb927.11.11580				2										407			hypothetical protein, conserved
Tb927.11.11650				2										1006			WW domain containing protein, putative
Tb927.11.12840				2										3963			Domain of unknown function (DUF4486), putative
Tb927.11.13210				2										342			hypothetical protein, conserved
Tb927.11.1340				2										1156			Flagella connector protein 1
Tb927.11.13500				2										592			par1
Tb927.11.14210				2										1504			conserved protein
Tb927.11.15120				2										723			hypothetical protein, conserved
Tb927.11.15610				2										997			hypothetical protein, conserved
Tb927.11.16880				2										628			leucine-rich repeat protein (LRRP), putative
Tb927.11.3910				2										1108			hypothetical protein, conserved
Tb927.11.4420				2										529			hypothetical protein, conserved
Tb927.11.4730				2										332			hypothetical protein, conserved
Tb927.11.5270				2										765			ubiquitin carboxyl-terminal hydrolase, putative
Tb927.11.6400				2										986			kinesin, putative
Tb927.11.6940				2										370			hypothetical protein, conserved
Tb927.11.7180				2										653			MORN repeat, putative
Tb927.11.8760				2										527			hypothetical protein, conserved
Tb927.11.8860				2										632			CEP76 C2 domain containing protein, putative
Tb927.11.8920				2										558			hypothetical protein, conserved
Tb927.11.9860				2										103			EF-hand domain pair, putative
Tb927.2.1180				2										579			retrotransposon hot spot protein 3 (RHS3), putative
Tb927.2.4520				2										1254			hypothetical protein, conserved
Tb927.2.4780				2										940			hypothetical protein, conserved
Tb927.3.1990				2										481			Tetratricopeptide repeat, putative
Tb927.3.2040				2										1072			kinesin, putative
Tb927.3.2070				2										1352			hypothetical protein, conserved
Tb927.3.2830				2										364			brix domain containing protein, putative
Tb927.3.5370				2										313			hypothetical protein, conserved
Tb927.3.5450				2										899			hypothetical protein, conserved
Tb927.3.990				2										479			hypothetical protein, conserved
Tb927.4.2140				2										1000			MBO2
Tb927.4.3120				2										933			hook complex protein, conserved
Tb927.4.910				2										305			hypothetical protein, conserved
Tb927.5.1010				2										1315			hypothetical protein, conserved
Tb927.5.1080				2										237			RNA-binding protein, putative
Tb927.5.1680				2										1751			hypothetical protein, conserved
Tb927.5.2040				2										326			hypothetical protein, conserved
Tb927.5.2440				2										1177			WW domain containing protein, putative
Tb927.6.1920				2										390			hypothetical protein, conserved
Tb927.6.4610				2										413			Ankyrin repeats (3 copies), putative
Tb927.6.5090				2										819			hypothetical protein, conserved
Tb927.6.5170				2										337			retrotransposon hot spot protein (RHS, pseudogene), putative
Tb927.7.2390				2										951			Tripartite attachment complex protein 102
Tb927.7.2730				2										307			leucine-rich repeat protein (LRRP), putative
Tb927.7.3130				2										956			hypothetical protein, conserved
Tb927.7.4020				2										746			protein phosphatase 2C, putative
Tb927.7.4330				2										934			Iguana/Dzip1-like DAZ-interacting protein N-terminal, putative
Tb927.7.5370				2										1147			hypothetical protein, conserved
Tb927.7.5610				2										1090			hypothetical protein, conserved
Tb927.7.6460				2										845			Defective in exine formation 1 homolog, putative
Tb927.7.6760				2										1236			hypothetical protein, conserved
Tb927.8.3180				2										1156			Protein of unknown function (DUF3250), putative
Tb927.8.3540				2										968			hypothetical protein, conserved
Tb927.8.3780				2										166			MORN repeat, putative
Tb927.8.560				2										577			hypothetical protein, conserved
Tb927.8.5940				2										472			hypothetical protein, conserved
Tb927.8.6640				2										604			Male sterility protein, putative
Tb927.8.750				2										366			nucleolar RNA-binding protein, putative
Tb927.8.780				2										1025			hypothetical protein, conserved
Tb927.8.8160				2										821			hypothetical protein, conserved
Tb927.9.11830				2										653			hypothetical protein, conserved
Tb927.9.12800				2										1059			hypothetical protein, conserved
Tb927.9.14240				2										752			Nucleoporin
Tb927.9.14480				2										98			dynein-associated protein, putative
Tb927.9.1600				2										1605			hypothetical protein, conserved
Tb927.9.1880				2										569			WD domain, G-beta repeat, putative
Tb927.9.1910				2										215			hypothetical protein, conserved
Tb927.9.3440				2										318			cyclophilin type peptidyl-prolyl cis-trans isomerase, putative
Tb927.9.4420				2										415			hypothetical protein, conserved
Tb927.9.5020				2										451			HMG-box domain containing protein, putative
Tb927.9.9300				2										482			hypothetical protein, conserved
Tb927.5.4420					3					6	4			632	*		nucleolar RNA helicase II, putative
Tb927.11.14630					2									1408			ATP-dependent DNA DEAD/DEAH box helicase, putative
Tb927.9.12510					2									735			ATP-dependent DEAD/H RNA helicase, putative
Tb927.2.2970							3	2	2	3		2	2	312	*		mitochondrial carrier protein
Tb927.5.4380							2	4						636			kinetoplastid-specific phospho-protein phosphatase, putative
Tb927.10.11330							2	2	2			3	3	228			EF-hand domain pair, putative
Tb927.7.1740							2		6					257	*		60S ribosomal protein L7, putative
Tb927.10.3980							2							187
Tb927.7.2670								5	8	19		13	2	461	*		zinc finger protein family member, putative
Tb927.1.1030								5	6					457			leucine-rich repeat protein (LRRP), putative
Tb927.10.14930								3	4	9		9		285	*		Zinc finger CCCH domain-containing protein 39
Tb927.5.520								3	2	3		5	4	531	*		stomatin-like protein, putative
Tb927.10.15530								3					2	602			ABC transport system ATP-binding protein, putative
Tb927.10.12260								3						475			cytosolic nonspecific dipeptidase, putative
Tb927.8.8050								2	5	4		8		739			Nucleoporin
Tb927.11.6620								2	2	10		2		422			nucleic acid binding protein, putative
Tb927.7.2300								2	2	2		4	2	1203			Nucleoporin
Tb927.5.2150								2		3		2		529			hypothetical protein, conserved
Tb927.11.6990								2			2			608			serine/threonine protein kinase, putative
Tb927.3.3770								2						286			paraflagellar rod component, putative
Tb927.4.5220								2						320			hypothetical protein
Tb927.8.7480									7	12		11		635			hypothetical protein, conserved
Tb927.7.2680									6	5				708			zinc finger protein family member, putative
Tb927.11.1850									4	6		9		495			hypothetical protein, conserved
Tb927.8.5420									4	5		6		414			methyltransferase domain containing protein, putative
Tb927.5.4120									4			2		191			hypothetical protein, conserved
Tb927.4.4600									4					260	*		Mitochondrial ribosomal protein L51 / S25 / CI-B8 domain containing protein, putative
Tb927.2.2470									4					762			Kinetoplastid RNA editing protein 1
Tb927.4.3810									3	7		11		1190	*		DNA-directed RNA polymerase II subunit 2, putative
Tb927.9.6510									3	6		6		666			hypothetical protein, conserved
Tb927.3.5310									3	6		5		2128			paraflagellar rod protein
Tb927.10.14860									3	6		3		713			Complex 1 protein (LYR family), putative
Tb927.11.10080									3	2		4		189			hypothetical protein, conserved
Tb927.10.10400									3			3		326			hypothetical protein, conserved
Tb927.3.820									3			3		188			hypothetical protein, conserved
Tb927.9.11880									3			3		440			hypothetical protein, conserved
Tb927.10.600									3			2		541			hypothetical protein, conserved
Tb927.11.10570									3			2		333			hypothetical protein, conserved
Tb927.2.3180									3					1003			kinetoplast polyadenylation/uridylation factor 1
Tb927.5.3530									3					264			hypothetical protein, conserved
Tb927.7.3430									3					231			cyclophilin-type peptidyl-prolyl cis-trans isomerase, putative
Tb927.4.1270									2	11		11		459			ruvB-like DNA helicase, putative
Tb927.10.2290									2	8		12		416	*		chaperone protein DNAj, putative
Tb927.5.1490									2	8		11		1118	*		Eukaryotic translation initiation factor 4 gamma 1
Tb927.8.900									2	7		8		328	*		splicing factor TSR1
Tb927.10.14950									2	7		6		432	*		Zinc finger CCCH domain-containing protein 40
Tb927.4.3070									2	6		11		448			hypothetical protein, conserved
Tb927.11.6970									2	6		8		388			NADH-cytochrome b5 reductase-like protein
Tb927.6.2210									2	5		10		1128	*		hypothetical protein, conserved
Tb927.11.7290									2	5		9		1467	*		pantothenate kinase subunit, putative
Tb927.11.5500									2	5		5		812	*		Mitochondrial SSU ribosomal protein, putative
Tb927.11.5650									2	5		4		587			replication factor C, subunit 1, putative
Tb927.10.13730									2	4		3		298	*		60S ribosomal protein L7, putative
Tb927.11.9320									2	4		3		211			hypothetical protein, conserved
Tb927.10.9660									2	3		3		776			hypothetical protein, conserved
Tb927.11.630									2	3		3		1596			RNA polymerase I second largest subunit
Tb927.10.8910									2	2		4		1664			nucleoporin, putative
Tb927.9.11150									2	2		3		881			hypothetical protein, conserved
Tb927.2.5130									2	2		2		390			hypothetical protein, conserved
Tb927.10.12330									2	2				202			zinc finger protein family member, putative
Tb927.9.4680									2	2				404			Eukaryotic initiation factor 4A-1
Tb927.7.5170									2		3	4	3	164	*		60S ribosomal protein L23a
Tb927.11.14950									2			5		139			zinc finger protein 2
Tb927.11.6000									2			4		351	*		ribosomal protein L4/L1 family, putative
Tb927.11.9830									2			4		197			hypothetical protein, conserved
Tb927.10.13770									2			3		113			hypothetical protein, conserved
Tb927.11.14980									2			3		507			phosphatidylethanolamine-binding protein, putative
Tb927.11.3640									2			3		185			hypothetical protein, conserved
Tb927.11.9450									2			3		190			cyclophilin type peptidyl-prolyl cis-trans isomerase, putative
Tb927.10.3580									2			2		324			hypothetical protein, conserved
Tb927.3.5240									2			2		581			hypothetical protein, conserved
Tb927.7.2990									2			2		309			hypothetical protein, conserved
Tb927.3.1380									2					519	*		ATP synthase subunit beta, mitochondrial
Tb927.4.5170									2					167	*		ribosomal protein L7/L12, putative
Tb927.9.7170									2					471	*		Mitochondrial 39-S ribosomal protein L47 (MRP-L47), putative
Tb927.10.3250									2					307			hypothetical protein, conserved
Tb927.10.8620									2					183			hypothetical protein, conserved
Tb927.11.11630									2					242			hypothetical protein, conserved
Tb927.11.12720									2					492			hypothetical protein, conserved
Tb927.5.4110									2					861			hypothetical protein, conserved
Tb927.7.3050									2					1165			hypothetical protein, conserved
Tb927.8.3170									2					796			hypothetical protein, conserved
Tb927.10.9780										12		4		878	*		ATP-dependent DEAD/H RNA helicase, putative
Tb927.10.15360										12		4		1769			hypothetical protein, conserved
Tb927.2.5240										11		5		509			PRP19-like protein, putative
Tb927.7.1100										11		2		737			hypothetical protein, conserved
Tb927.11.6720										10		8		1057	*		mRNA cap guanine-N7 methyltransferase, putative
Tb927.4.470										9	2	7		229	*		snoRNP protein GAR1, putative
Tb927.4.750										9		7		145	*		50S ribosomal protein L7Ae, putative
Tb927.4.3890										9		4		1093	*		ATP-dependent RNA helicase, putative
Tb927.11.11790										8		8		553			R3H domain containing protein, putative
Tb927.10.14870										8		6		681			hypothetical protein, conserved
Tb927.11.4380										8		5		2196			ATP-dependent RNA helicase, putative
Tb927.11.9760										8		4		430			hypothetical protein, conserved
Tb927.9.8740										8		4		327			Double RNA binding domain protein 3
Tb927.4.3160										8		2		1242			dihydroxyacetone phosphate acyltransferase, putative
Tb927.5.1580										7		10		566			zinc finger CCCH domain containing protein 13
Tb927.9.11110										7		9		2403			PRP8 protein homologue
Tb927.10.2910										7		7		378	*		splicing factor PTSR1 interacting protein
Tb927.11.9750										7		7		629			Protein of unknown function (DUF498/DUF598), putative
Tb927.11.10480										7		5		975			PQQ-like domain/WD domain, G-beta repeat/Utp21 specific WD40 associated putative domain containing protein, putative
Tb927.2.4710										7		4		441			RNA-binding protein, putative
Tb927.4.2000										7		4		474			ruvB-like DNA helicase, putative
Tb927.8.3560										7		4		928			DNA repair and recombination helicase protein PIF5
Tb927.11.1670										7		3		437			cysteine desulfurase
Tb927.9.12300										7		3		357			replication factor C, subunit 3, putative
Tb927.10.13270										7		2		939			Periodic tryptophan protein 2 homolog, putative
Tb927.6.2640										7		2		533			importin alpha subunit, putative
Tb927.9.12570										7				512			glycerol kinase, glycosomal
Tb927.10.11660										6		7		400			hypothetical protein, conserved
Tb927.3.1860										6		7		771			ATP-grasp domain containing protein, putative
Tb927.5.2060										6		7		727			cell division control protein, putative
Tb927.11.8770										6		6		401			ATP-dependent RNA helicase FAL1, putative
Tb927.8.6440										6		6		184			RNA-binding protein, putative
Tb927.11.1090										6		4		5795			calpain-like protein, putative
Tb927.4.3850										6		3		453			NLE (NUC135) domain/WD domain, G-beta repeat, putative
Tb927.9.12610										6		3		512			glycerol kinase, glycosomal
Tb927.4.2130										6		2		318			hypothetical protein, conserved
Tb927.8.1090										6		2		746			NPAPL
Tb927.4.3540										5		6		379			hypothetical protein, conserved
Tb927.5.4410										5		5		218			hypothetical protein, conserved
Tb927.11.16020										5		4		433			RNA-binding protein, putative
Tb927.3.1350										5		4		786			hypothetical protein, conserved
Tb927.3.910										5		4		447			tubulin gamma chain
Tb927.11.13360										5		3		1281	*		AAA ATPase, putative
Tb927.8.5650										5		3		914	*		hypothetical protein, conserved
Tb927.11.280										5		3		648			hypothetical protein, conserved
Tb927.5.3590										5		3		608			Putative zinc finger motif, C2HC5-type/ASCH domain containing protein, putative
Tb927.6.2730										5		3		1844			hypothetical protein, conserved
Tb927.7.1170										5		3		159			RNA-binding protein, putative
Tb927.7.2170										5		3		1481			hypothetical protein, conserved
Tb927.8.6420										5		3		498			beta-ketoacyl-ACP reductase 2
Tb927.10.10380										5		2		520			ATP-dependent DEAD/H RNA helicase, putative
Tb927.10.15740										5		2		517			hypothetical protein, conserved
Tb927.11.9950										5		2		772			hypothetical protein, conserved
Tb927.2.2260										5		2		4277			phosphatidylinositol kinase related protein, putative
Tb927.3.1910										5		2		591			Histone RNA hairpin-binding protein RNA-binding domain containing protein, putative
Tb927.7.3970										5		2		290			hypothetical protein, conserved
Tb927.8.6180										5				143	*		60S ribosomal protein L26, putative
Tb927.9.4310										5				327	*		tricarboxylate carrier, putative
Tb927.6.2670										5				294			RNA decapping enzyme
Tb927.11.350										4		6		435	*		RNA-binding protein, putative
Tb927.3.3970										4		6		297	*		Cell growth-regulating nucleolar protein, putative
Tb927.11.8270										4		5		805			hypothetical protein, conserved
Tb927.10.1540										4		4		564			zinc finger protein family member, putative
Tb927.10.470										4		4		525			choline dehydrogenase, putative
Tb927.10.7990										4		4		349			replication factor C subunit 3, putative
Tb927.8.5990										4		4		638			NLE (NUC135) domain/WD domain, G-beta repeat, putative
Tb927.9.15330										4		4		897			U3 small nucleolar RNA-associated protein 6, putative
Tb927.8.2290										4		3		219			hypothetical protein, conserved
Tb927.10.15870										4		2		241	*		RNA binding protein, putative
Tb927.7.710										4		2		639	*		heat shock 70 kDa protein, putative
Tb927.9.14410										4		2		362	*		RNA re-capping enzyme, cytoplasmic
Tb927.1.4490										4		2		172			acetyltransferase, putative
Tb927.10.7280										4		2		1062			pre-mRNA splicing factor ATP-dependent RNA helicase, putative
Tb927.5.3020										4		2		420			hypothetical protein, conserved
Tb927.6.1870										4		2		427			Eukaryotic translation initiation factor 4E-4
Tb927.9.13580										4		2		422			hypothetical protein, conserved
Tb927.9.2650										4		2		606			Present in the outer mitochondrial membrane proteome 2
Tb927.10.12740										4				474	*		Zinc finger CCCH domain-containing protein 35
Tb927.11.3190										4				1650	*		hypothetical protein, conserved
Tb927.6.3890										4				347	*		replication factor C, subunit 2, putative
Tb927.9.7590										4				194	*		60S ribosomal protein L11, putative
Tb927.10.10850										4				903			Protein argonaute-1
Tb927.10.11150										4				226			hypothetical protein, conserved
Tb927.10.1210										4				680			katanin, putative
Tb927.10.6610										4				274			chaperone protein DNAj, putative
Tb927.10.7440										4				950			MTR4
Tb927.11.13310										4				302			hypothetical protein, conserved
Tb927.11.7780										4				419			Mitochondrial import receptor subunit ATOM46
Tb927.2.280										4				789			retrotransposon hot spot protein 2 (RHS2), putative
Tb927.2.4210										4				525			Phosphoenolpyruvate carboxykinase [ATP], glycosomal
Tb927.2.830										4				352			retrotransposon hot spot protein (RHS, pseudogene), putative
Tb927.3.5190										4				358			hypothetical protein, conserved
Tb927.4.3770										4				485			protein kinase, putative
Tb927.5.3100										4				254			hypothetical protein
Tb927.6.3690										4				423			pre-mRNA cleavage complex II Clp1-like, conserved
Tb927.7.3810										4				381			Cold-shock' DNA-binding domain containing protein, putative
Tb927.8.2300										4				221			hypothetical protein, conserved
Tb927.5.3810										3	2	2		458	*		orotidine-5-phosphate decarboxylase/orotate phosphoribosyltransferase, putative
Tb927.3.1890										3		7		284	*		cytochrome c oxidase assembly protein, putative
Tb927.4.2880										3		5		2070	*		Nucleoporin
Tb927.9.14420										3		5		384			cyclophilin-like protein, putative
Tb927.11.5060										3		4		1041	*		Mitochondrial small ribosomal subunit Rsm22, putative
Tb927.3.1920										3		4		604	*		General negative regulator of transcription subunit 5
Tb927.10.13620										3		4		485			NADH-ubiquinone oxidoreductase complex I subunit,FT putative
Tb927.10.13960										3		4		589			paralyzed flagella protein 20
Tb927.10.15370										3		4		337			DNA-directed RNA polymerases I and III subunit RPAC1, putative
Tb927.11.1100										3		4		1409			cysteine peptidase, Clan CA, family C2, putative
Tb927.11.14560										3		4		1452			cleavage and polyadenylation specificity factor-like protein, putative
Tb927.4.1310										3		4		416			ZFP family member, putative
Tb927.8.5820										3		4		378			Las1-like, putative
Tb927.3.3950										3		3		550	*		hypothetical protein, conserved
Tb927.7.2660										3		3		405	*		zinc finger protein family member, putative
Tb927.11.13380										3		3		2026			ATP-dependent helicase, putative
Tb927.11.8890										3		3		134			DNA-dependent RNA polymerases, putative
Tb927.5.2790										3		3		813			mitochondrial DNA polymerase beta-PAK
Tb927.7.7230										3		3		320			nitroreductase
Tb927.9.11220										3		2		356	*		hypothetical protein, conserved
Tb927.1.5030										3		2		735			leucine-rich repeat protein (LRRP), putative
Tb927.10.8730										3		2		442			ABC1 family, putative
Tb927.11.1660										3		2		706			vesicular transport protein (CDC48 homologue), putative
Tb927.11.500										3		2		219			RNA-binding protein, UBP1
Tb927.11.6150										3		2		418			60Kd inner membrane protein, putative
Tb927.11.6850										3		2		240			Optic atrophy 3 protein (OPA3), putative
Tb927.5.680										3		2		585			hypothetical protein, conserved
Tb927.6.4340										3		2		117			U6 snRNA-associated Sm-like protein LSm5p
Tb927.7.3120										3		2		106			small nuclear ribonucleoprotein SmD1
Tb927.9.3130										3		2		566			hypothetical protein, conserved
Tb927.9.6870										3		2		148			RNA-binding protein, putative
Tb927.3.3940										3				593	*		RNA-binding protein, putative
Tb927.10.12030										3				250			hypothetical protein, conserved
Tb927.10.14730										3				443			chaperone protein DNAj, putative
Tb927.10.6790										3				1727			Gamma-tubulin complex component 3-like protein
Tb927.11.1080										3				545			hypothetical protein, conserved
Tb927.11.11610										3				572			Cactus-binding C-terminus of cactin protein, putative
Tb927.11.14270										3				751			protein kinase, putative
Tb927.11.1700										3				570			hypothetical protein, conserved
Tb927.11.5250										3				1584			hypothetical protein, conserved
Tb927.11.5970										3				714			phosphoinositide-specific phospholipase C, putative
Tb927.11.7930										3				149			RNA polymerase B subunit RPB8, putative
Tb927.2.380										3				789			retrotransposon hot spot protein 2 (RHS2), putative
Tb927.3.720										3				130			zinc finger protein 3
Tb927.4.4230										3				755			RNA-binding protein, putative
Tb927.4.4550										3				823			hypothetical protein, conserved
Tb927.5.3230										3				2181			hypothetical protein, conserved
Tb927.6.1440										3				302			hypothetical protein, conserved
Tb927.6.4950										3				147			mago nashi-like protein, putative
Tb927.6.5110										3				1270			damage-specific DNA binding protein, putative
Tb927.7.4490										3				1643			hypothetical protein, conserved
Tb927.8.1260										3				1034			Molybdopterin guanine dinucleotide synthesis protein B, putative
Tb927.8.3610										3				446			AKAP7 2'5' RNA ligase-like domain containing protein, putative
Tb927.9.15380										3				373			NADH-ubiquinone oxidoreductase complex I subunit, putative
Tb927.9.6130										3				157			calmodulin, putative
Tb927.6.2230										2	2			775			RGG protein
Tb927.11.6430										2		10		1259	*		hypothetical protein, conserved
Tb927.4.2850										2		8		681			hypothetical protein, conserved
Tb927.9.9450										2		7		1030			zinc finger protein family member, putative
Tb927.10.2770										2		4		382	*		eukaryotic translation initiation factor 5, putative
Tb927.11.3070										2		4		576	*		ribosome assembly protein RRB1, putative
Tb927.10.9440										2		4		491			NADH dehydrogenase
Tb927.11.7280										2		4		133			DNA-direcetd RNA polymerase II, subunit 9, putative
Tb927.3.3060										2		4		304			hypothetical protein, conserved
Tb927.5.690										2		4		151			hypothetical protein, conserved
Tb927.5.840										2		4		994			KRI1-like family/KRI1-like family C-terminal, putative
Tb927.8.580										2		4		355			hypothetical protein, conserved
Tb927.1.1200										2		3		429	*		SSU ribosomal protein, mitochondrial
Tb927.11.14090										2		3		480	*		Double RNA binding domain protein 18
Tb927.11.16740										2		3		384	*		chaperone protein DNAj, putative
Tb927.1.4230										2		3		426			hypothetical protein, conserved
Tb927.10.13320										2		3		219			DNA-directed RNA polymerase II/III subunit, putative
Tb927.11.510										2		3		175			RNA-binding protein, UBP2
Tb927.11.6790										2		3		781			predicted WD40 repeat protein
Tb927.11.9900										2		3		553			phytoene synthase, putative
Tb927.2.2940										2		3		299			hypothetical protein, conserved
Tb927.2.3400										2		3		334			hypothetical protein, conserved
Tb927.3.4380										2		3		479			Tob55, putative
Tb927.8.5280										2		3		257			hypothetical protein, conserved
Tb927.8.5370										2		3		458			hypothetical protein, conserved
Tb927.9.11120										2		3		602			Chromosome passenger complex (CPC) protein INCENP N terminal, putative
Tb927.11.11480										2		2		658	*		Trichohyalin, putative
Tb927.11.13280										2		2		224	*		mitochondrial RNA binding protein 2
Tb927.1.1130										2		2		617			glycerol-3-phosphate dehydrogenase (FAD-dependent), putative
Tb927.1.880										2		2		4592			Midasin, putative
Tb927.10.15710										2		2		323			mitochondrial carrier protein
Tb927.10.4430										2		2		572			pumillo RNA binding protein PUF1
Tb927.10.670										2		2		226			hypothetical protein, conserved
Tb927.11.2600										2		2		926			hypothetical protein, conserved
Tb927.11.2910										2		2		383			phosphoglycerate mutase, putative
Tb927.11.3970										2		2		729			hypothetical protein, conserved
Tb927.11.7220										2		2		3042			neurobeachin/beige protein, putative
Tb927.3.970										2		2		370			NAD binding domain of 6-phosphogluconate dehydrogenase/NAD-binding of NADP-dependent 3-hydroxyisobutyrate dehydrogenase, putative
Tb927.4.670										2		2		652			conserved protein, unknown function
Tb927.5.2290										2		2		2237			ATP-dependent RNA helicase, putative
Tb927.6.4080										2		2		205			hypothetical protein, conserved
Tb927.6.4780										2		2		746			DNA ligase I, putative
Tb927.7.4470										2		2		193			hypothetical protein, conserved
Tb927.7.7080										2		2		372			mitochondrial glycoprotein-like protein
Tb927.8.1290										2		2		1106			hypothetical protein, conserved
Tb927.8.5040										2		2		278			EMG1/NEP1 methyltransferase, putative
Tb927.8.6410										2		2		474			short-chain dehydrogenase, putative
Tb927.8.6520										2		2		434			hypothetical protein, conserved
Tb927.9.11230										2		2		141			calmodulin-like protein, putative
Tb927.9.7070										2		2		304			exosome complex exonuclease RRP40
Tb927.9.7800										2		2		264			hypothetical protein, conserved
Tb927.10.13720										2				377	*		RNA-binding protein 29, putative
Tb927.10.6300										2				435	*		Ribosomal protein S5, C-terminal domain containing protein, putative
Tb927.10.8200										2				269	*		Ribosomal protein L1p/L10e family, putative
Tb927.4.1630										2				736	*		ribosomal RNA processing protein 6
Tb927.5.1060										2				489	*		mitochondrial processing peptidase, beta subunit, putative
Tb927.7.1240										2				769	*		sphingosine kinase A, B, putative
Tb11.02.5090										2				251			proliferator-activated receptor-interacting protein (PRIP) interacting protein (PIMT), putative, pseudogene
Tb927.1.4760										2				1028			Vacuolar sorting protein 39 domain 1/Vacuolar sorting protein 39 domain 2, putative
Tb927.10.10700										2				355			splicing factor Prp31
Tb927.10.110										2				493			retrotransposon hot spot protein 2 (RHS2), pseudogene
Tb927.10.11810										2				638			hypothetical protein, conserved
Tb927.10.12000										2				99			iron-sulfur cluster assembly protein, putative
Tb927.10.12090										2				116			RNA-binding protein, putative
Tb927.10.13640										2				456			hypothetical protein, conserved
Tb927.10.15330										2				605			CYTH domain containing protein, putative
Tb927.10.15810										2				207			Fcf1, putative
Tb927.10.1660										2				295			hypothetical protein, conserved
Tb927.10.3500										2				878			RNA-binding protein, putative
Tb927.10.5930										2				490			protein kinase, putative
Tb927.10.8960										2				237			hypothetical protein, conserved
Tb927.10.9200										2				413			Nuclease-related domain containing protein, putative
Tb927.10.9910										2				449			PSP1 C-terminal conserved region, putative
Tb927.11.10880										2				470			hypothetical protein, conserved
Tb927.11.11260										2				493			hypothetical protein, conserved
Tb927.11.12750										2				277			cleavage and polyadenylation specificity factor 30 kDa subunit
Tb927.11.14150										2				214			hypothetical protein, conserved
Tb927.11.16670										2				570			hypothetical protein, conserved
Tb927.11.2160										2				154			hypothetical protein, conserved
Tb927.11.230										2				818			cleavage and polyadenylation specificity factor, putative
Tb927.11.2330										2				505			molybdopterin synthase sulphurylase protein, putative
Tb927.11.2461										2				93
Tb927.11.3850										2				1558			AMP deaminase, putative
Tb927.11.4650										2				259			hypothetical protein, conserved
Tb927.11.4740										2				514			paraflagellar rod component, putative
Tb927.11.480										2				382			small GTP-binding protein domain containing protein, putative
Tb927.11.5190										2				1498			leucine-rich repeat protein (LRRP), putative
Tb927.11.6980										2				607			hypothetical protein, conserved
Tb927.11.7140										2				313			cell cycle sequence binding phosphoprotein (RBP45), putative
Tb927.11.7702										2				108			hypothetical protein
Tb927.2.1140										2				340			retrotransposon hot spot protein (RHS, pseudogene), putative
Tb927.2.1210										2				841			retrotransposon hot spot protein 4 (RHS4), putative
Tb927.2.270										2				581			retrotransposon hot spot protein (RHS, pseudogene), putative
Tb927.2.4130										2				803			enoyl-CoA hydratase/Enoyl-CoA isomerase/3-hydroxyacyl-CoA dehydrogenase, putative
Tb927.2.5020										2				728			acyl-CoA oxidase, putative
Tb927.2.5850										2				111			small nuclear ribonucleoprotein SmD2
Tb927.2.820										2				527			retrotransposon hot spot protein (RHS, pseudogene), putative
Tb927.3.1930										2				479			WD domain, G-beta repeat, putative
Tb927.3.4020										2				2312			phosphatidylinositol 4-kinase alpha, putative
Tb927.3.5500										2				337			DNA-directed RNA polymerase II subunit 3, putative
Tb927.4.1440										2				205			probable rRNA maturation factor YbeY, putative
Tb927.4.2910										2				584			hypothetical protein, conserved
Tb927.4.3020										2				1440			ATP-dependent DEAH-box RNA helicase, putative
Tb927.4.3360										2				444			hypothetical protein, conserved
Tb927.4.4490										2				1759			multidrug resistance protein E
Tb927.4.5240										2				382			UDP-Gal or UDP-GlcNAc-dependent glycosyltransferase, putative
Tb927.5.1150										2				735			RNA helicase Prp43
Tb927.5.1510										2				312			hypothetical protein, conserved
Tb927.5.2890										2				2163			AAA domain (dynein-related subfamily)/von Willebrand factor type A domain containing protein, putative
Tb927.5.800										2				332			casein kinase I, isoform 2
Tb927.6.3500										2				2236			endosomal trafficking protein RME-8, putative
Tb927.6.3530										2				280			hypothetical protein, conserved
Tb927.7.1700										2				644			hypothetical protein, conserved
Tb927.7.2570										2				473			guide RNA associated protein, GAP2
Tb927.7.4030										2				538			hypothetical protein, conserved
Tb927.7.4310										2				477			pyridine nucleotide-disulphide oxidoreductase, putative
Tb927.7.5150										2				1454			hypothetical protein, conserved
Tb927.7.5760										2				135			nuclear transport factor 2 protein, putative
Tb927.7.6980										2				1834			Mono-functional DNA-alkylating methyl methanesulfonate N-term/CPSF A subunit region, putative
Tb927.8.2040										2				251			Domain of unknown function (DUF1767), putative
Tb927.8.2090										2				194			cyclophilin type peptidyl-prolyl cis-trans isomerase, putative
Tb927.8.2770										2				3099			inositol 1,4,5-trisphosphate receptor
Tb927.8.3410										2				1518			Inositol hexakisphosphate, putative
Tb927.8.4390										2				475			translation initiation factor eIF-2B subunit beta, putative
Tb927.8.5090										2				1781			DNA-directed RNA polymerase I largest subunit
Tb927.8.6770										2				419			WD domain, G-beta repeat, putative
Tb927.8.7200										2				1123			Region in Clathrin and VPS, putative
Tb927.8.7490										2				1445			hypothetical protein, conserved
Tb927.9.11740										2				183			cyclophilin type peptidyl-prolyl cis-trans isomerase, putative
Tb927.9.12710										2				394			hypothetical protein, conserved
Tb927.9.13610										2				1330			helicase, putative
Tb927.9.13780										2				293			hypothetical protein, conserved
Tb927.9.14030										2				759			hypothetical protein, conserved
Tb927.9.15010										2				204			hypothetical protein, conserved
Tb927.9.15090										2				219			cytosolic coat protein, putative
Tb927.9.2980										2				81			hypothetical protein, conserved
Tb927.10.13100											3			438			hypothetical protein, conserved, CIF3
Tb927.10.3360											3			940			PTP1-interacting protein, 39 kDa
Tb927.10.15410											2			323	*		glycosomal malate dehydrogenase
Tb927.3.1820											2			245			mitochondrial RNA binding complex 1 subunit
Tb927.8.7990											2			4942			Thioredoxin-like/Protein of unknown function (DUF3638)/Protein of unknown function (DUF3645), putative
Tb927.11.11570												7		800			Translation initiation factor eIF-2B subunit epsilon, putative
Tb927.3.750												6		334			SET domain containing protein, putative
Tb927.10.12680												5		170	*		60S ribosomal protein L34, putative
Tb927.9.5730												5		422	*		nucleosome assembly protein-like protein
Tb927.9.5880												5		550			SKIP/SNW domain containing protein, putative
Tb927.5.2770												4		407			SET domain containing protein, putative
Tb927.7.740												4		547			chaperone protein DNAj, putative
Tb927.10.15680												3		2399			hypothetical protein, conserved
Tb927.10.15940												3		366			cation transporter, putative
Tb927.10.1630												3		631			atp-binding cassette sub-family e member 1
Tb927.10.5880												3		626			Proteophosphoglycan, putative
Tb927.10.6320												3		613			CBF/Mak21 family, putative
Tb927.10.7870												3		191			hypothetical protein, conserved
Tb927.11.14970												3		823			hypothetical protein, conserved
Tb927.11.16920												3		917			VSG exclusion protein 1
Tb927.11.2200												3		132			DNA-directed RNA polymerase II, putative
Tb927.11.2960												3		108			hypothetical protein, conserved
Tb927.11.6660												3		935			Tex-like protein N-terminal domain/Helix-hairpin-helix motif containing protein, putative
Tb927.11.8210												3		1349			RAD50 DNA repair-like protein
Tb927.11.8430												3		261			hypothetical protein, conserved
Tb927.2.6100												3		487			hypothetical protein, conserved
Tb927.4.1540												3		508			NAD dependent epimerase/dehydratase family, putative
Tb927.4.4040												3		259			hypothetical protein, conserved
Tb927.4.590												3		818			PQQ-like domain/Protein of unknown function (DUF1620), putative
Tb927.5.2660												3		860			NUC130/3NT domain/SDA1, putative
Tb927.5.3980												3		374			hypothetical protein, conserved
Tb927.5.4270												3		828			ATP-dependent DEAD/H RNA helicase, putative
Tb927.9.10560												3		168			Present in the outer mitochondrial membrane proteome 6
Tb927.10.1450												2	2	2872			plectin, putative
Tb927.10.13300												2		282	*		30S ribosomal protein S8, putative
Tb927.10.6850												2		320	*		Mitochondrial ribosomal protein S18, putative
Tb927.10.9890												2		871	*		hypothetical protein, conserved
Tb927.11.3240												2		544	*		T-complex protein 1, zeta subunit, putative
Tb927.11.6320												2		472	*		MRB1-associated protein
Tb927.3.5610												2		473	*		ribosomal protein L3 mitochondrial, putative
Tb927.7.2760												2		278	*		xxxx Ribosome
Tb927.7.3680												2		153	*		xxxx Ribosome
Tb927.7.4710												2		296	*		39S mitochondrial ribosomal protein L46, putative
Tb927.9.11280												2		307	*
Tb927.9.5150												2		126	*		ribosomal protein S6, putative
Tb927.1.1580												2		301			electron transport protein SCO1/2, putative
Tb927.1.1620												2		739			ATP-dependent DEAD/H RNA helicase, putative
Tb927.1.1750												2		470			conserved protein, unknown function
Tb927.10.11080												2		1164			paraflagellar rod protein
Tb927.10.11230												2		323			Ras-induced vulval development antagonist, putative
Tb927.10.1170												2		1747			intraflagellar transport protein 172
Tb927.10.11950												2		202			hypothetical protein, conserved
Tb927.10.13020												2		915			Vacuolar protein sorting-associated protein 16 homolog, putative
Tb927.10.13360												2		470			Elongation factor Tu, mitochondrial
Tb927.10.13600												2		158			hypothetical protein, conserved
Tb927.10.15080												2		1634			hypothetical protein, conserved
Tb927.10.15640												2		704			WD domain, G-beta repeat, putative
Tb927.10.4050												2		557			serine palmitoyltransferase, putative
Tb927.10.5220												2		447			hypothetical protein, conserved
Tb927.10.5660												2		335			heat shock protein, putative
Tb927.10.6650												2		241			G10 protein homologue, putative
Tb927.10.7230												2		2521			Flagellar Member 1
Tb927.10.8160												2		107			hypothetical protein, conserved
Tb927.10.9920												2		410			hypothetical protein, conserved
Tb927.11.10780												2		279			hypothetical protein, conserved
Tb927.11.12050												2		621			hypothetical protein, conserved
Tb927.11.1260												2		961			copper-transporting ATPase-like protein, putative
Tb927.11.13180												2		560			Present in the outer mitochondrial membrane proteome 10
Tb927.11.13600												2		413			DnaJ domain containing protein, putative
Tb927.11.14170												2		618			hypothetical protein, conserved
Tb927.11.14360												2		339			mitochondrial carrier protein
Tb927.11.15430												2		974			U5 small nuclear ribonucleoprotein component, putative
Tb927.11.15870												2		384			hypothetical protein, conserved
Tb927.11.16430												2		153			18 kDa ER-associated protein
Tb927.11.2690												2		493			succinyl-coA:3-ketoacid-coenzyme A transferase, mitochondrial precursor, putative
Tb927.11.3980												2		518			metallo-peptidase, Clan ME, Family M16
Tb927.11.7590												2		974			hypothetical protein, conserved
Tb927.11.9930												2		256			NADH-ubiquinone oxidoreductase complex I subunit, putative
Tb927.2.5810												2		1543			Holliday-junction resolvase-like of SPT6/SH2 domain containing protein, putative
Tb927.3.1710												2		378			hypothetical protein, conserved
Tb927.3.2900												2		418			Eukaryotic translation initiation factor 2 subunit alpha
Tb927.3.3540												2		511			Nucleoporin
Tb927.3.3680												2		137			hypothetical protein, conserved
Tb927.3.4120												2		677			hypothetical protein, conserved
Tb927.4.1340												2		770			cleavage and polyadenylation specificity factor subunit, putative
Tb927.5.1200												2		309			exosome component CSL4
Tb927.5.2280												2		434			acetyltransferase, putative
Tb927.5.3240												2		797			hypothetical protein, conserved
Tb927.5.820												2		208			hypothetical protein, conserved
Tb927.6.2010												2		523			AMP-binding enzyme, putative
Tb927.6.2600												2		143			Protein of unknown function (DUF1077), putative
Tb927.6.3510												2		535			tRNA modification enzyme, putative
Tb927.6.3930												2		426			hypothetical protein, conserved
Tb927.7.2330												2		1099			Protein of unknown function (DUF1663), putative
Tb927.7.2410												2		600			Dynamin family, putative
Tb927.7.3910												2		504			hypothetical protein, conserved
Tb927.7.4440												2		292			NAD dependent epimerase/dehydratase family, putative
Tb927.7.4620												2		275			hypothetical protein, conserved
Tb927.7.4950												2		404			NAD(P)-dependent steroid dehydrogenase protein, putative
Tb927.7.5840												2		229			hypothetical protein, conserved
Tb927.7.6930												2		490			ATPase, putative
Tb927.7.880												2		277			RNA-binding protein, putative
Tb927.8.1480												2		2468			RAVE protein 1 C terminal, putative
Tb927.8.2700												2		239			hypothetical protein, conserved
Tb927.8.4820												2		622			eukaryotic translation initiation factor 4 gamma 3
Tb927.8.6120												2		308			hypothetical protein, conserved
Tb927.9.10100												2		1449			hypothetical protein, conserved
Tb927.9.10160												2		225			hypothetical protein, conserved
Tb927.9.11560												2		325			hypothetical protein, conserved
Tb927.9.12170												2		291			leucine-rich repeat protein (LRRP), putative
Tb927.9.12900												2		580			RNA polymerase-associated protein LEO1, putative
Tb927.9.1470												2		156			hypothetical protein, conserved
Tb927.9.2240												2		779			protein kinase, putative
Tb927.9.2590												2		1088			hypothetical protein, conserved
Tb927.9.6910												2		162			hypothetical protein, conserved
Tb927.4.2940													2	328			hypothetical protein, conserved
